# Supplementary material
Source: PubMed Central journal article supplement (PMC2714983)

**Diastereoselective Pyrrolidine Synthesis *via* Copper Promoted Intramolecular  
Aminooxygenation of Alkenes; Formal Synthesis of (+)-Monomorine**

Monissa C. Paderes and Sherry R. Chemler\*

Department of Chemistry, 618 Natural Sciences Complex, University at Buffalo, State  
University of New York, Buffalo, NY 14260  
schemler@buffalo.edu

**Supporting Information 2:**

This contains  $^1\text{H}$ , *nOe* and  $^{13}\text{C}$  NMR spectra for all new compounds.



mcp-I-80  
 Pulse Sequence: s2pul  
 Solvent: CDCl3  
 Ambient temperature  
 INOVA-500 "tocsy.chem.buffalo.edu"

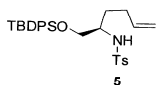

Relax. delay 2.000 sec  
 Pulse 34.6 degrees  
 Acq. time 1.031 sec  
 Width 10000.0 Hz  
 16 repetitions  
 OBSERVE H1, 499.8984048 MHz  
 DATA PROCESSING  
 Line broadening 0.7 Hz  
 FT size 65536  
 Total time 1 min, 18 sec

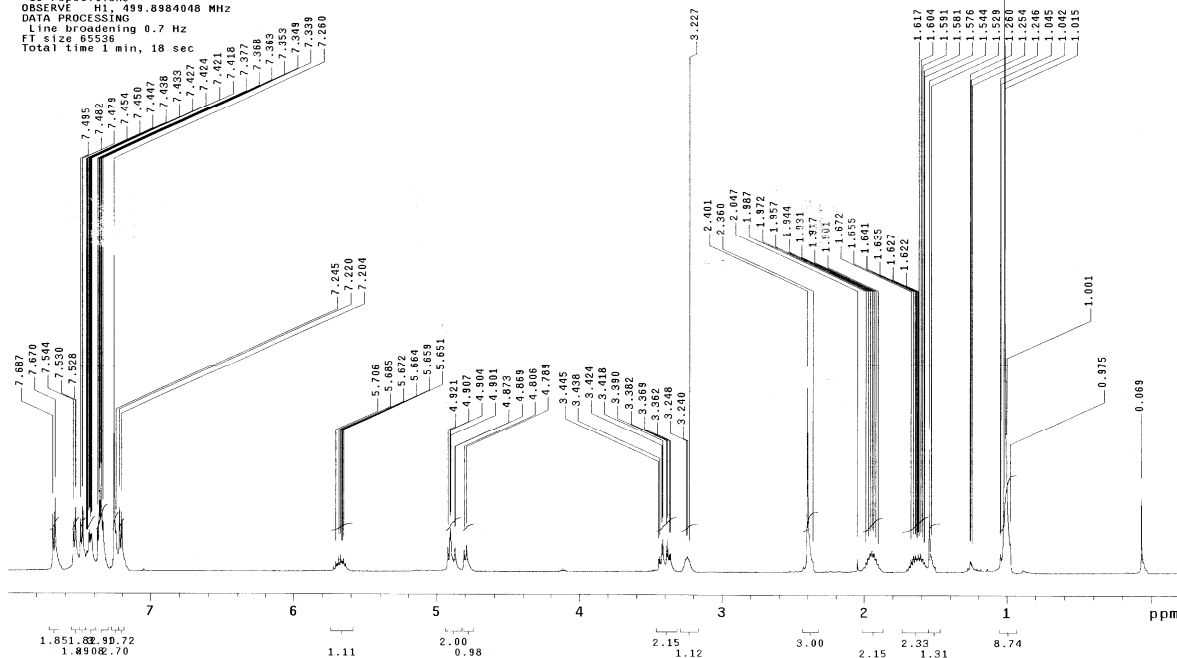

mcp-I-82CNMR

Pulse Sequence: s2pul  
 Solvent: CDCl3  
 Ambient temperature  
 Sample #2  
 File: mcp-I-82CNMR2  
 INOVA-500 "nrddata.chem.buffalo.edu"

Relax. delay 5.000 sec  
 Pulse 90.0 degrees  
 Acq. time 1.706 sec  
 Width 18761.7 Hz  
 5408 repetitions  
 OBSERVE C13, 75.4536604 MHz  
 DECOUPLE H1, 300.0754431 MHz  
 Power 1023 dB  
 continuously on  
 WALTZ-16 modulated  
 DATA PROCESSING  
 Line broadening 1.0 Hz  
 FT size 65536  
 Total time 14 hr, 55 min, 42 sec

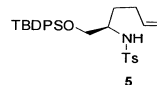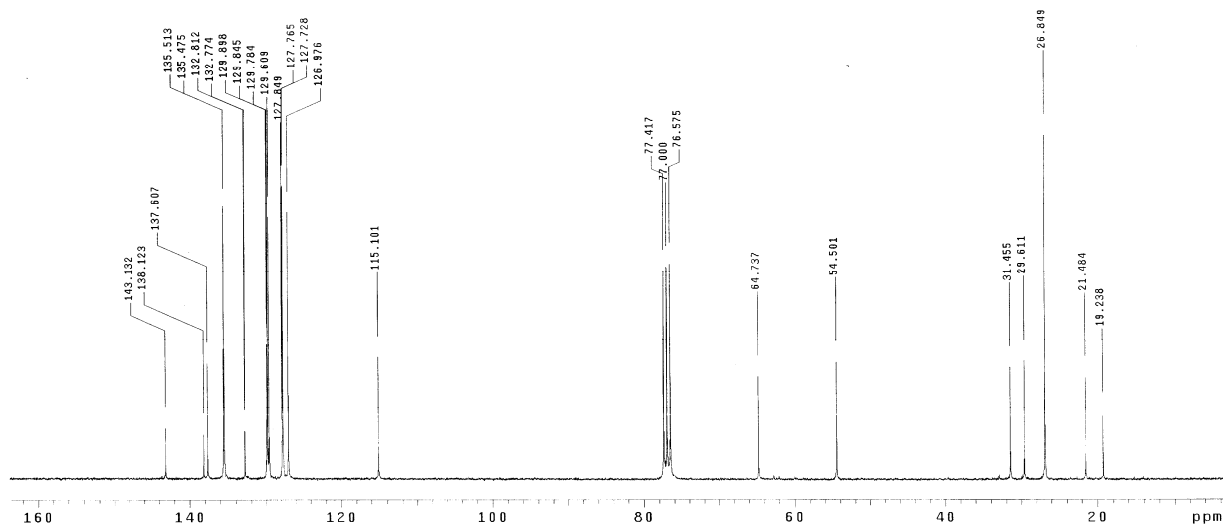

mcp-1-109  
 Pulse Sequence: s2pu1  
 Solvent: CDCl3  
 Ambient temperature  
 INOVA-500 "tocsy.chem.buffalo.edu"

Relax. delay 2.000 sec  
 Pulse 34.6 degrees  
 Acq. time 1.891 sec  
 Width 10000.0 Hz  
 16 repetitions  
 OBSERVE H1, 499.8984027 MHz  
 DATA PROCESSING  
 Line broadening 0.7 Hz  
 FT size 65536  
 Total time 1 min, 18 sec

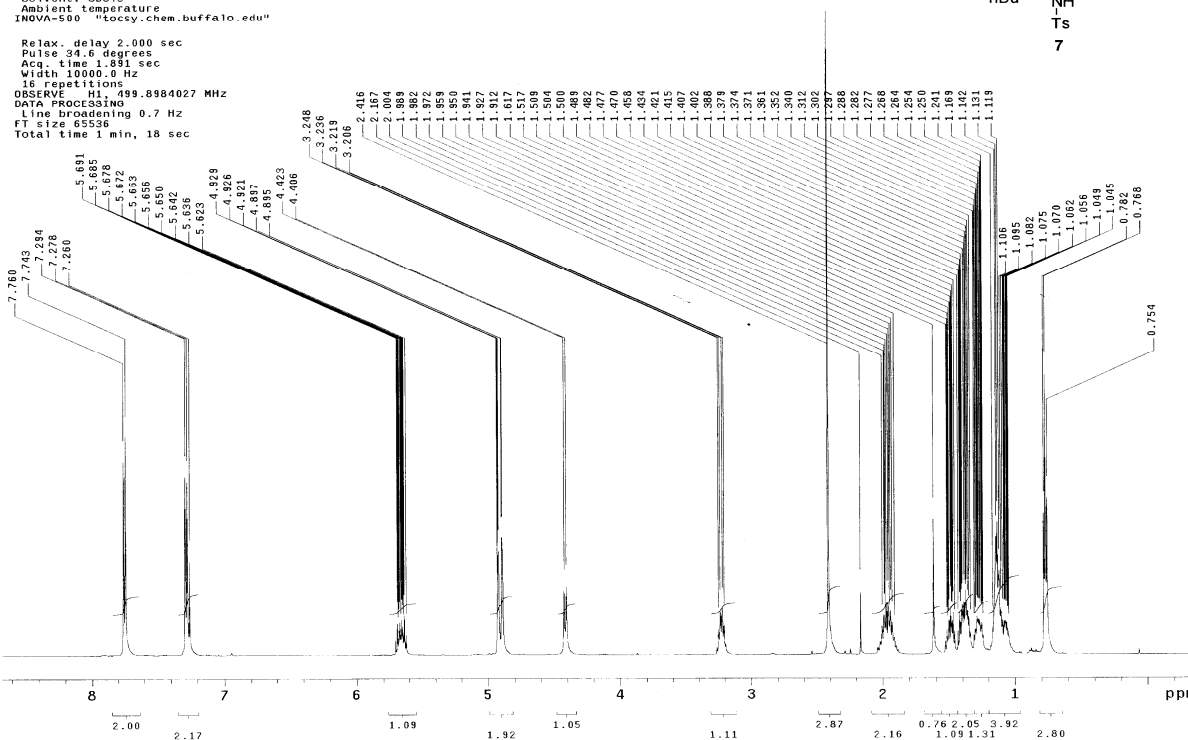

mcp-1-109CNMR  
 Pulse Sequence: s2pu1  
 Solvent: CDCl3  
 Ambient temperature  
 Sample #2  
 File: mcp-1-109CNMR  
 INOVA-500 "mrdata.chem.buffalo.edu"

Relax. delay 5.000 sec  
 Pulse 90.0 degrees  
 Acq. time 1.796 sec  
 Width 18761.7 Hz  
 4880 repetitions  
 OBSERVE C13, 75.4536593 MHz  
 DECOUPLE H1, 500.0754431 MHz  
 Power 1023 dB  
 continuously on  
 WALTZ-16 modulated  
 DATA PROCESSING  
 Line broadening 1.0 Hz  
 FT size 65536  
 Total time 14 hr, 55 min, 42 sec

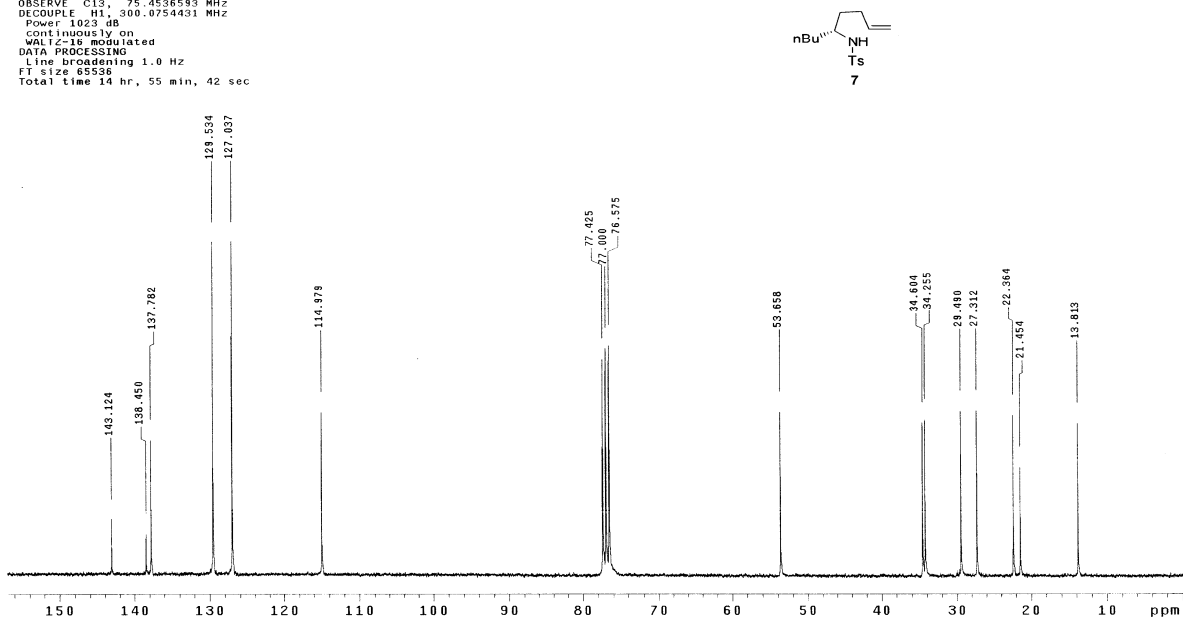



mcp-1-191

Pulse Sequence: s2pu1  
 Solvent: CDCl3  
 Ambient temperature  
 INOVA-500 "tocsy.chem.buffalo.edu"  
 Relax. delay 2.000 sec  
 Pulse 34.6 degrees  
 Acq. time 1.831 sec  
 Width 10000.0 Hz  
 16 repetitions  
 OBSERVE H1, 499.8984027 MHz  
 DATA PROCESSING  
 Line broadening 0.7 Hz  
 FT size 65536  
 Total time 1 min, 18 sec

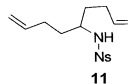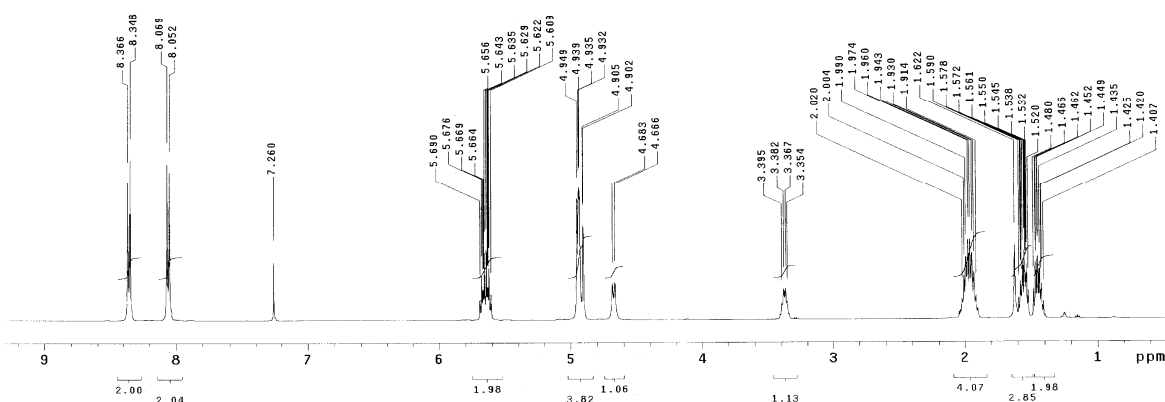

mcp-1-191CNMR

Pulse Sequence: s2pu1  
 Solvent: CDCl3  
 Ambient temperature  
 Sample #2  
 File: mcp-1-191CNMR  
 INOVA-500 "nmrdata.chem.buffalo.edu"

Relax. delay 5.000 sec  
 Pulse 40.0 degrees  
 Acq. time 1.705 sec  
 Width 18761.7 Hz  
 368 repetitions  
 OBSERVE C13, 75.4536621 MHz  
 DECOUPLE H1, 300.0754431 MHz  
 Power 1023.48  
 continuously on  
 WALTZ-16 modulated  
 DATA PROCESSING  
 Line broadening 1.0 Hz  
 FT size 65536  
 Total time 1 hr, 52 min, 21 sec

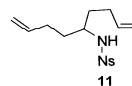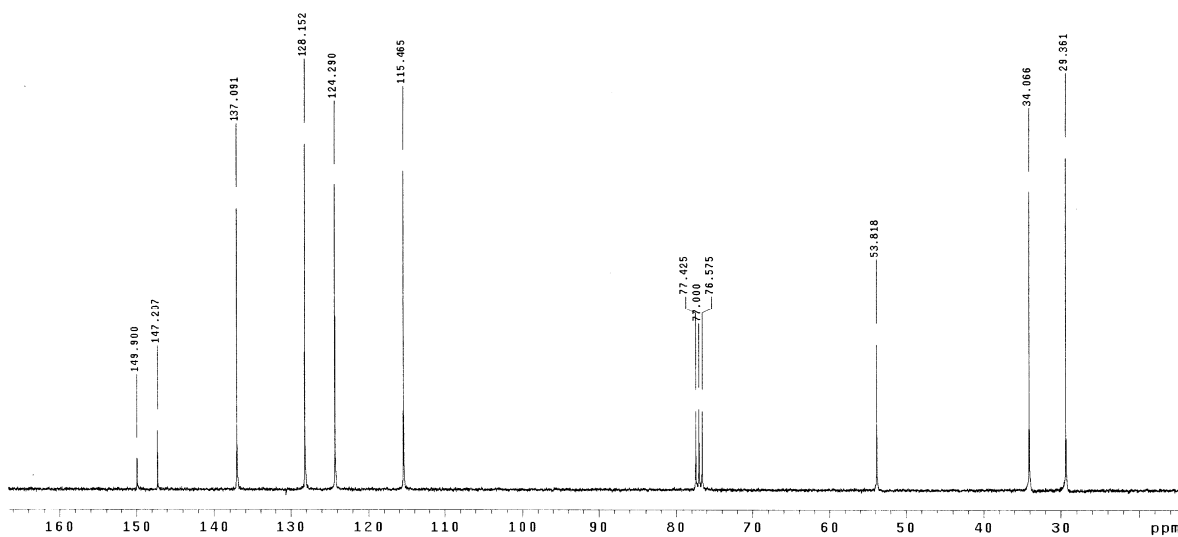

mcp-1-136  
 Pulse Sequence: s2pul  
 Solvent: CDCl3  
 Ambient Temperature  
 INOVA-500 "loxy.chem.buffalo.edu"  
 Relax. delay 2.000 sec  
 Pulse 34.8 degrees  
 Acq. time 1.891 sec  
 Width 10000.0 Hz  
 18 repetitions  
 OBSERVE H1, 499.8983908 MHz  
 DATA PROCESSING  
 Line broadening 0.7 Hz  
 FT size 65536  
 Total time 1 min, 18 sec

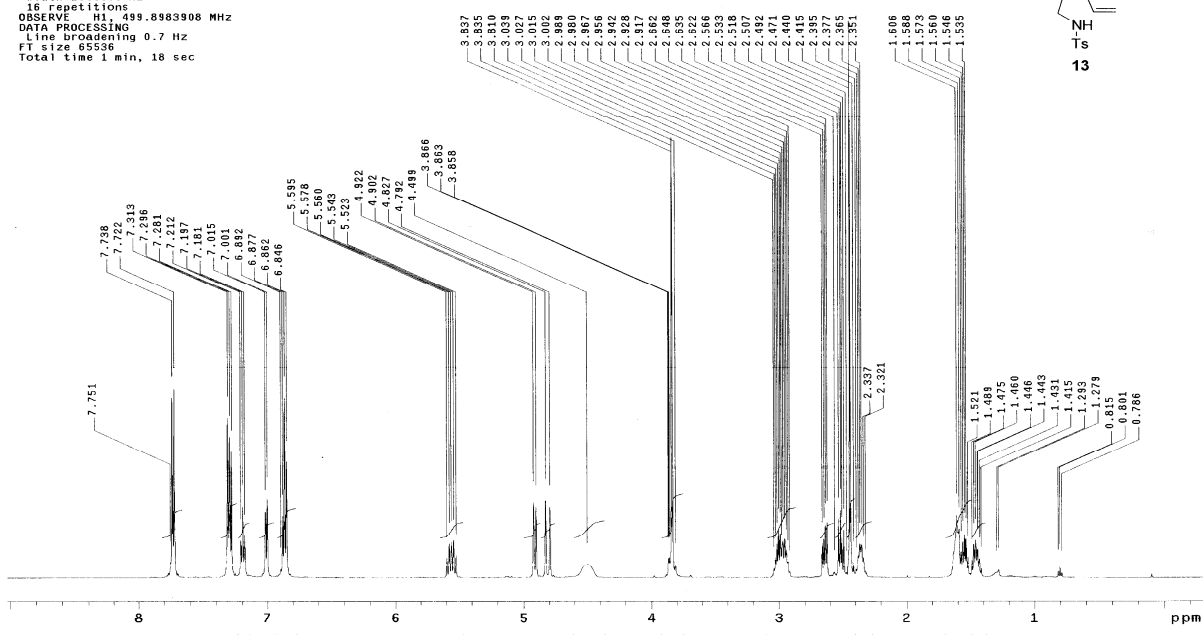

mcp-1-136CNMR  
 Pulse Sequence: s2pul  
 Solvent: CDCl3  
 Ambient Temperature  
 Sample #2  
 File: mcp-1-136CNMR  
 INOVA-500 "nmrdata.chem.buffalo.edu"  
 Relax. delay 5.000 sec  
 Pulse 99.0 degrees  
 Acq. time 1.706 sec  
 Width 18761.7 Hz  
 512 repetitions  
 OBSERVE C13, 75.4536599 MHz  
 DECOUPLE H1, 300.0754431 MHz  
 Power 1023 dB  
 CONTINUOUSLY ON  
 WALTZ-16 modulated  
 DATA PROCESSING  
 Line broadening 1.0 Hz  
 FT size 65536  
 Total time 1 hr, 29 min, 58 sec

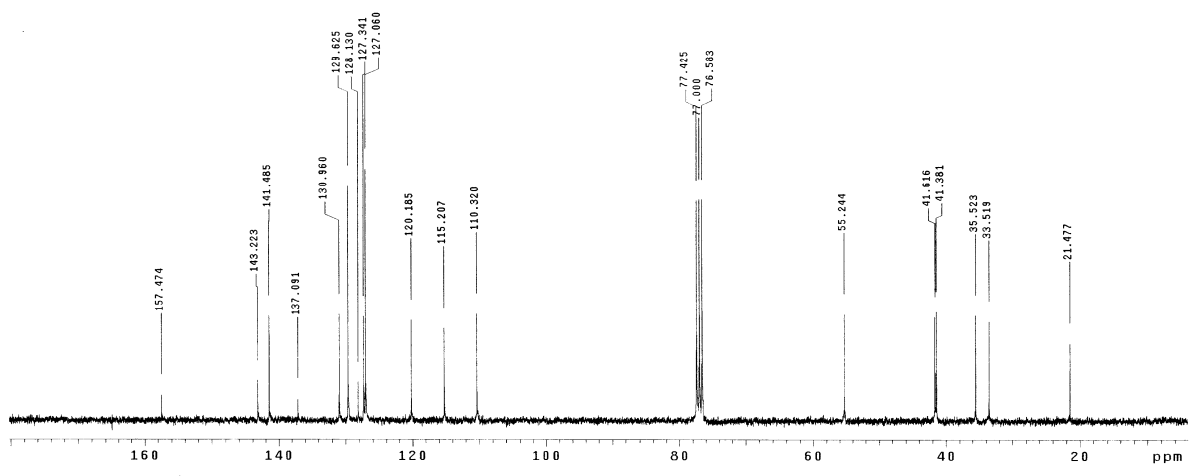

mcp-1-293  
 Pulse Sequence: s2pul  
 Solvent: CDCl3  
 Ambient Temperature  
 INOVA-500 "tocsy.chem.buffalo.edu"  
 Relax. delay 2.000 sec  
 Pulse 34.6 degrees  
 Acq. time 1.891 sec  
 Width 10000.0 Hz  
 16 repetitions  
 OBSERVE H1, 499.8983908 MHz  
 DATA PROCESSING  
 Line broadening 0.7 Hz  
 FT size 65536  
 Total time 1 min, 18 sec

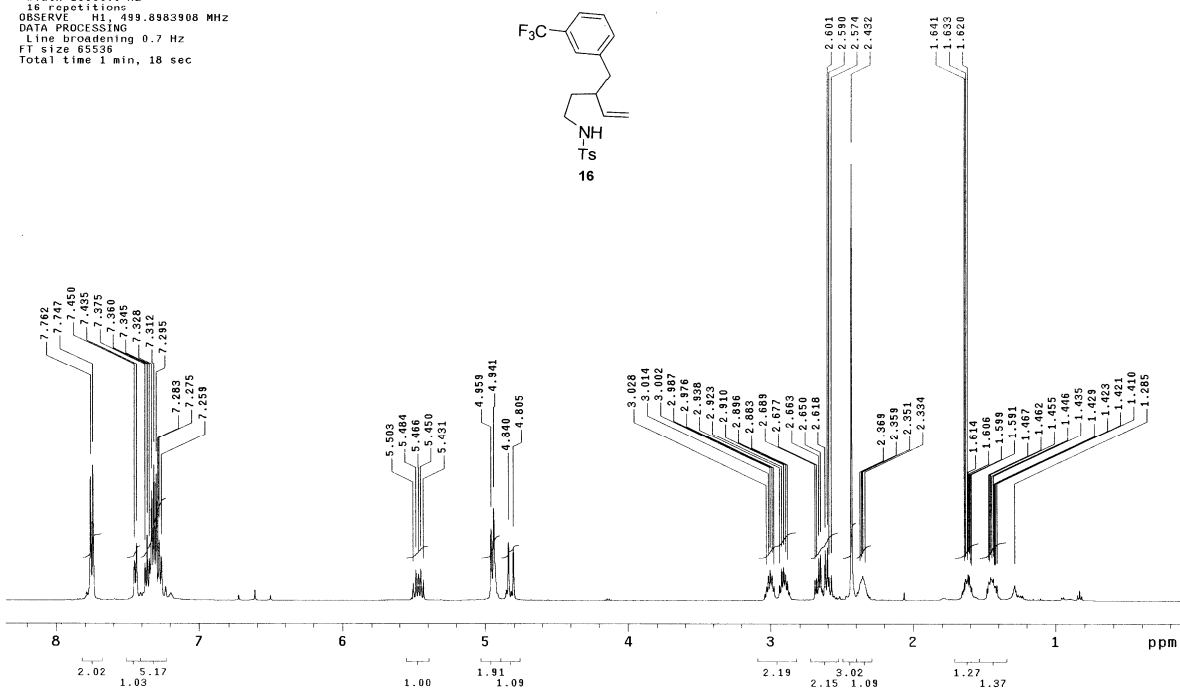

mcp-1-293CNMR  
 Pulse Sequence: s2pul  
 Solvent: CDCl3  
 Ambient temperature  
 Sample #2  
 File: mcp-1-293CNMR  
 INOVA-500 "nmrdata.chem.buffalo.edu"  
 Relax. delay 5.000 sec  
 Pulse 90.0 degrees  
 Acq. time 1.706 sec  
 Width 19761.7 Hz  
 4864 repetitions  
 OBSERVE C13, 75.4536639 MHz  
 DECOUPLE H1, 300.0754431 MHz  
 Power 1023 dB  
 continuously on  
 WALTZ-16 modulated  
 DATA PROCESSING  
 Line broadening 1.0 Hz  
 FT size 85536  
 Total time 19 hr, 3 min, 48 sec

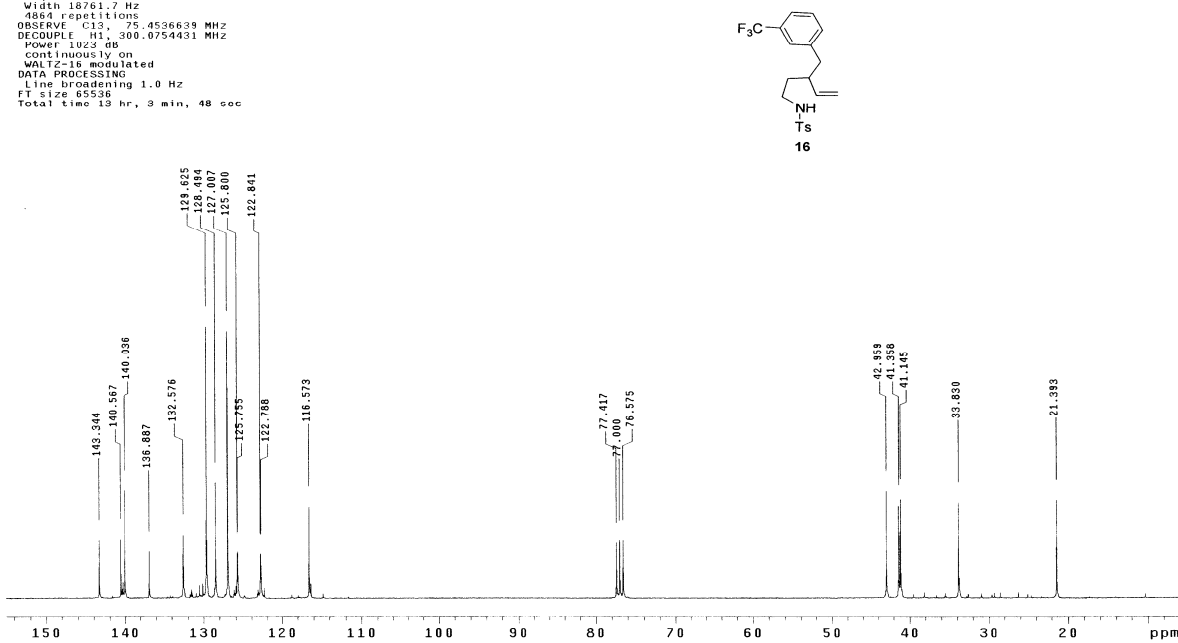



mcp-I-32spot2  
 Pulse Sequence: s2pu1  
 Solvent: CDCl3  
 Ambient temperature  
 Sample #2  
 File: mcp-I-32spot2run2  
 INOVA-500 "nmrdata.chem.buffalo.edu"

Relax. delay 2.000 sec  
 Pulse 34.6 degrees  
 Acq. time 1.851 sec  
 Width 10000.0 Hz  
 18 repetitions  
 OBSERVE H1, 499.8984030 MHz  
 DATA PROCESSING  
 Line broadening 0.7 Hz  
 FT size 65536  
 Total time 1 min, 18 sec

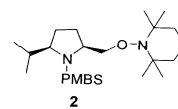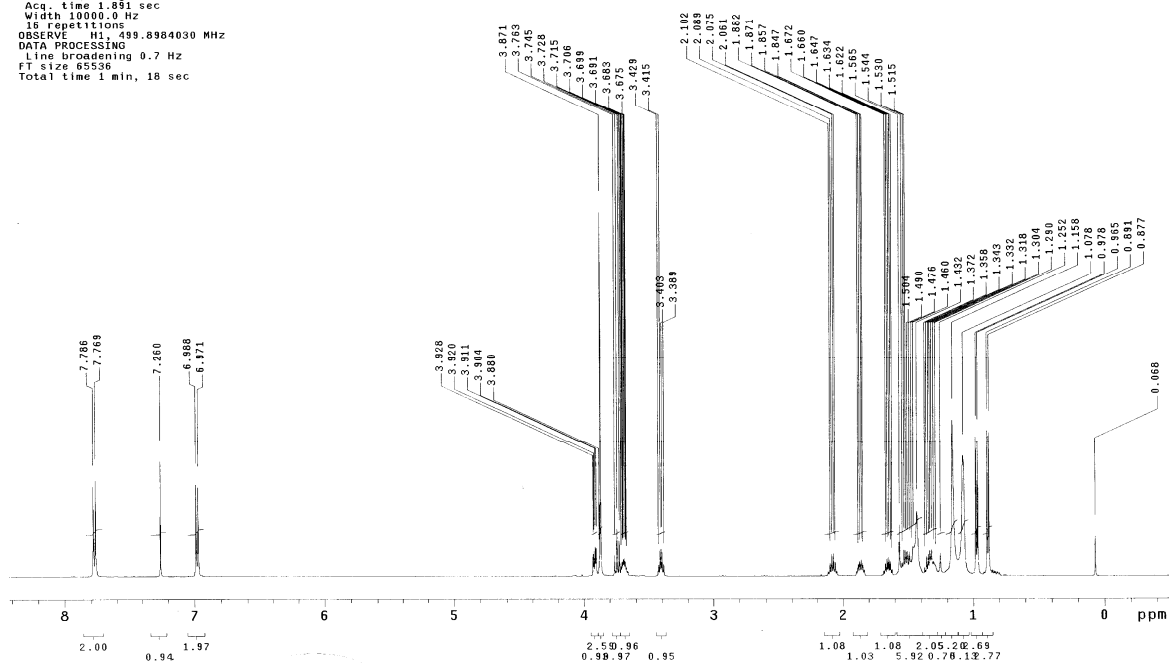

mcp-I-32spot2 CNMR  
 Pulse Sequence: s2pu1  
 Solvent: CDCl3  
 Ambient temperature  
 User: 1-14-87  
 File: mcp-I-32spot2CNMR  
 INOVA-500 "tocsy.chem.buffalo.edu"

Relax. delay 8.000 sec  
 Pulse 81.8 degrees  
 Acq. time 1.300 sec  
 Width 37037.0 Hz  
 5200 repetitions  
 OBSERVE C13, 125.6995550 MHz  
 DECOUPLE H1, 499.9008903 MHz  
 Power 40 dB  
 CONTINUOUSLY ON  
 WALTZ-16 modulated  
 DATA PROCESSING  
 Line broadening 0.5 Hz  
 FT size 131072  
 Total time 10 hr, 33 min, 57 sec

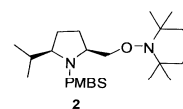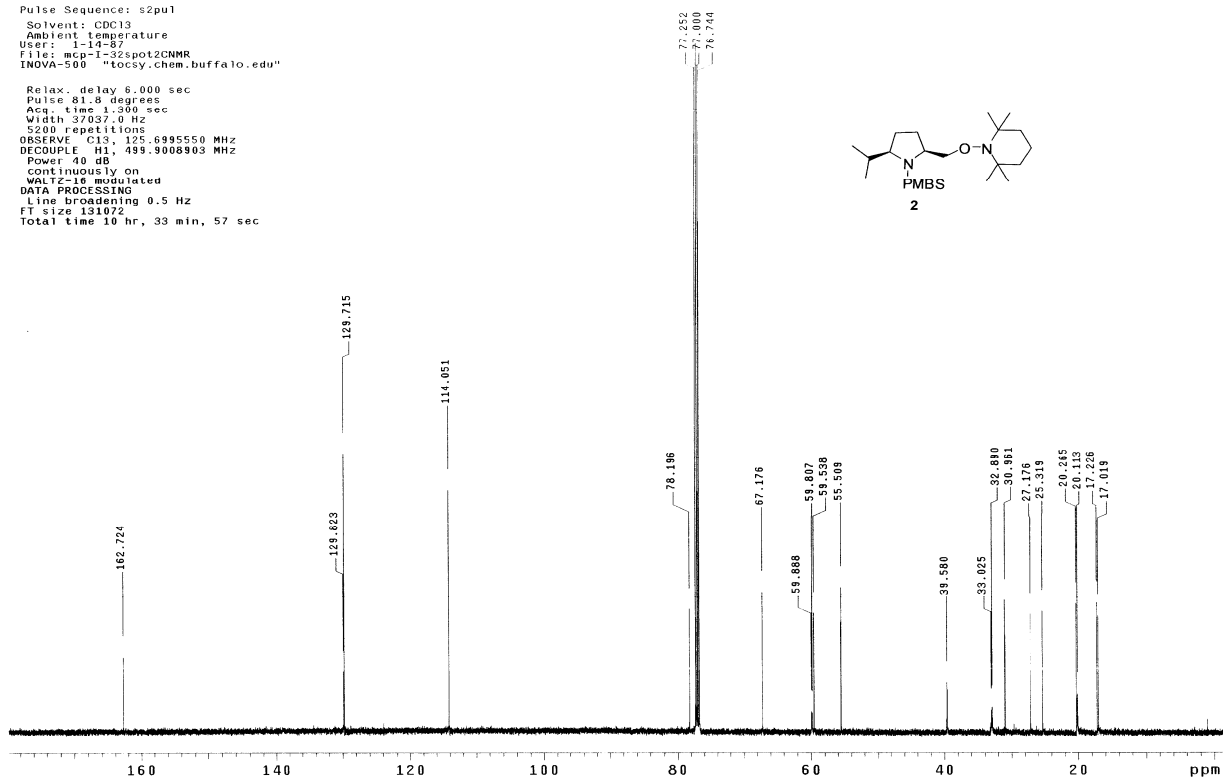

mcp-1-62  
 Pulse Sequence: s2pu1  
 Solvent: CDCl3  
 Ambient Temperature  
 Sample #2  
 File: mcp-1-62  
 INOVA-500 "mardata.chem.buffalo.edu"  
 Relax. delay 2.000 sec  
 Pulse 34.6 degrees  
 Acq. time 1.891 sec  
 Width 10000.0 Hz  
 8 repetitions  
 OBSERVE H1, 499.8984027 MHz  
 DATA PROCESSING  
 Line broadening 0.7 Hz  
 FT size 65536  
 Total time 1 min, 18 sec

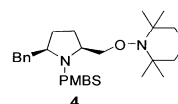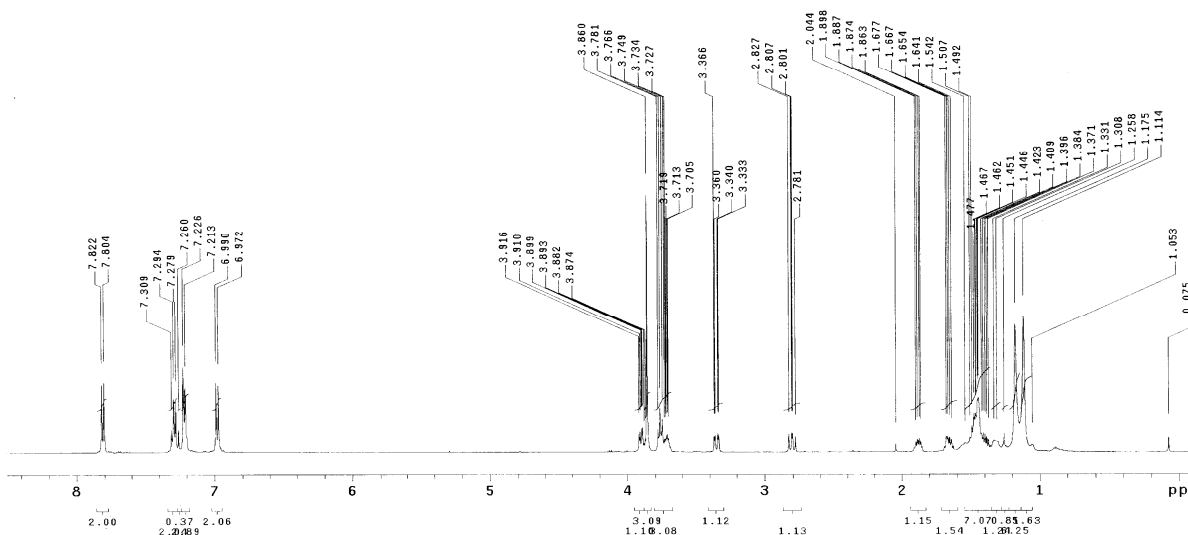

mcp-1-63  
 Pulse Sequence: s2pu1  
 Solvent: Benzene  
 Ambient Temperature  
 User: i-14-07  
 File: mcp-1-63  
 INOVA-500 "tocsy.chem.buffalo.edu"  
 Relax. delay 6.000 sec  
 Pulse 81.8 degrees  
 Acq. time 1.300 sec  
 Width 37037.0 Hz  
 1200 repetitions  
 OBSERVE C13, 125.6995191 MHz  
 DECOUPLE H1, 499.3003253 MHz  
 Power 40 dB  
 Continuously on  
 WALTZ-16 modulated  
 DATA PROCESSING  
 Line broadening 0.5 Hz  
 FT size 131072  
 Total time 2 hr, 26 min, 40 sec

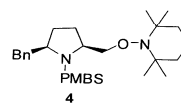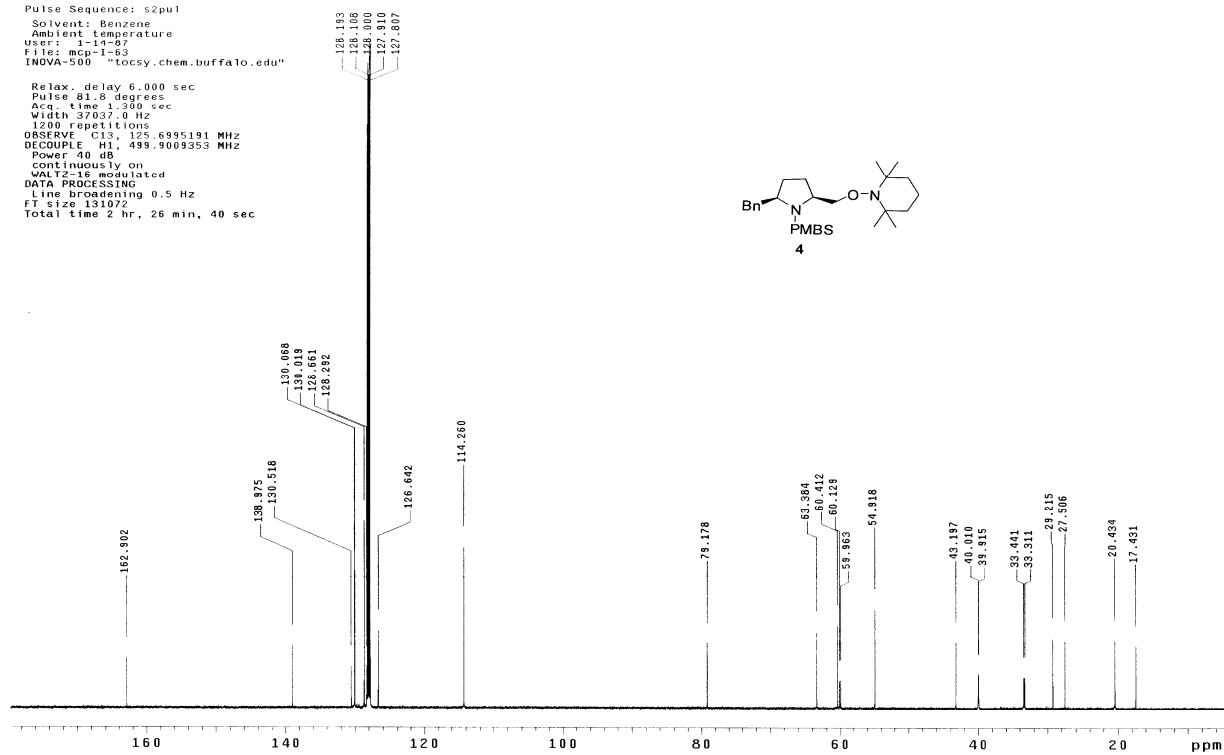

## STANDARD PROTON PARAMETERS

Pulse Sequence: N0ESY1D  
 Solvent: CDCl3  
 Ambient temperature  
 INOVA-500 "tocsy.chem.buffalo.edu"  
 Relax. delay 1.000 sec  
 Pulse 90.0 degrees  
 Mixing 0.500 sec  
 Acq. time 1.891 sec  
 Width 1876.3 Hz  
 1100 repetitions  
 OBSERVE H1, 499.8984261 MHz  
 DATA PROCESSING  
 Line broadening 0.5 Hz  
 FT size 8192  
 Total time 11 hr, 1 min, 59 sec

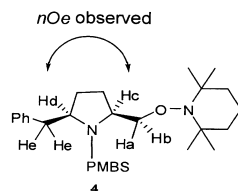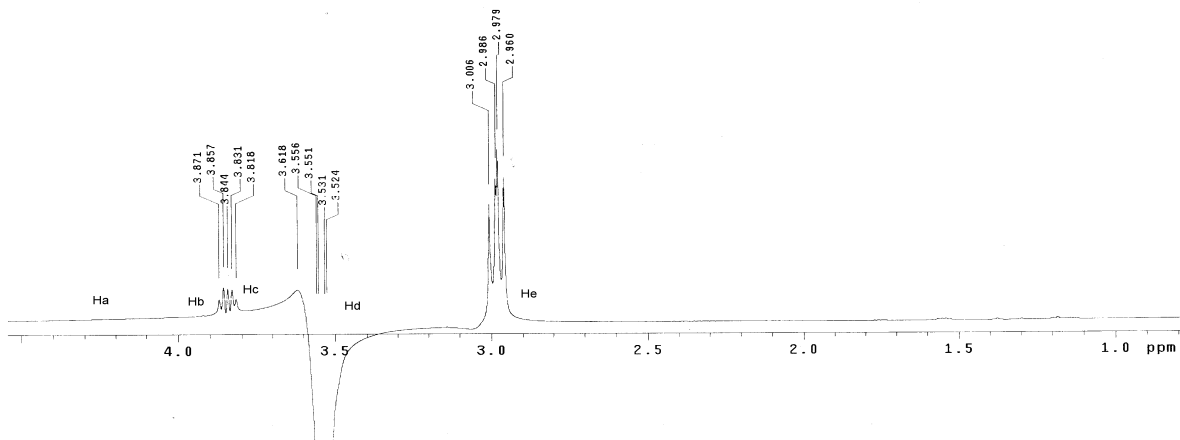

mcp-I-88afterhpic  
 Pulse Sequence: s2pul  
 Solvent: CDCl3  
 Ambient temperature  
 INOVA-500 "tocsy.chem.buffalo.edu"  
 Relax. delay 2.000 sec  
 Pulse 34.8 degrees  
 Acq. time 1.891 sec  
 Width 10000.0 Hz  
 18 repetitions  
 OBSERVE H1, 499.8983908 MHz  
 DATA PROCESSING  
 Line broadening 0.7 Hz  
 FT size 65536  
 Total time 1 min, 18 sec

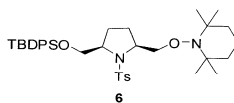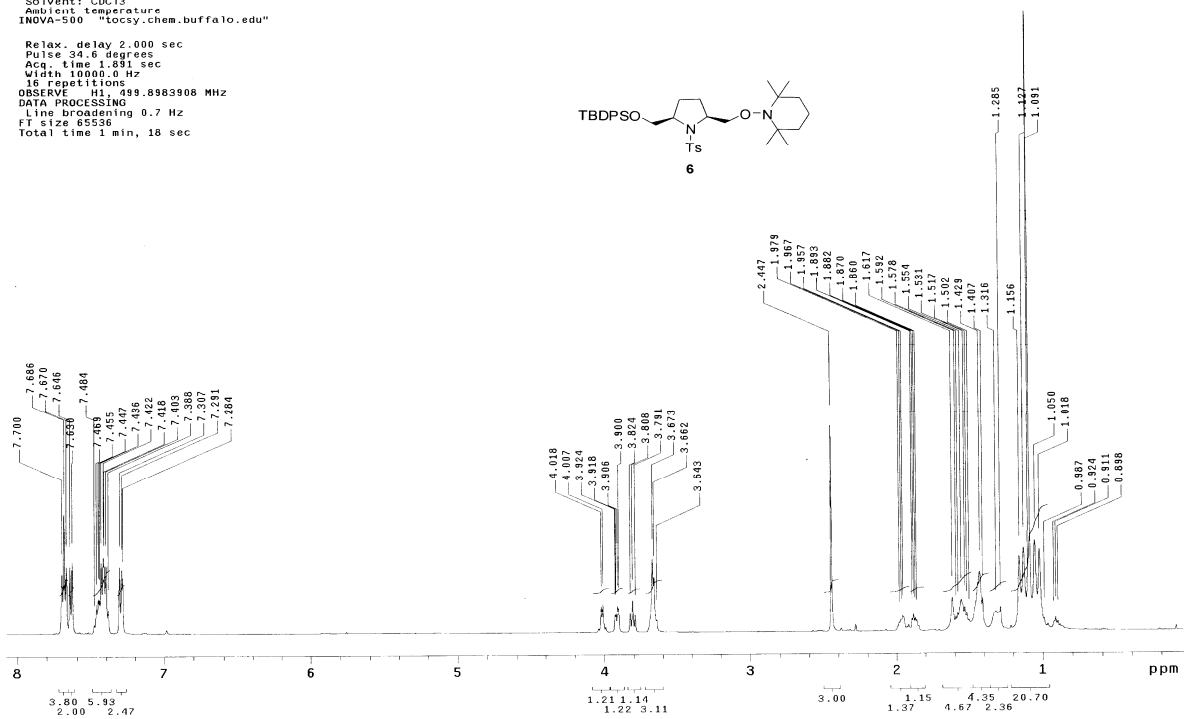

mcp-I-88CNMR

Pulse Sequence: s2pul  
 Solvent: CDCl3  
 Ambient temperature  
 Sample #2  
 File: mcp-I-88CNMR  
 INOVA-500 "nmrdata.chem.buffalo.edu"

Relax. delay 5.000 sec  
 Pulse 90.0 degrees  
 Acq. time 1.706 sec  
 Width 18761.7 Hz  
 5312 repetitions  
 OBSERVE C13, 75.4536589 MHz  
 DECOUPLE H1, 300.0754431 MHz  
 Power 1023 dB  
 continuously on  
 WALTZ-16 modulated  
 DATA PROCESSING  
 Line broadening 1.0 Hz  
 FT size 65536  
 Total time 14 hr, 55 min, 42 sec

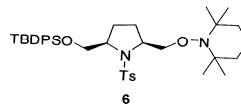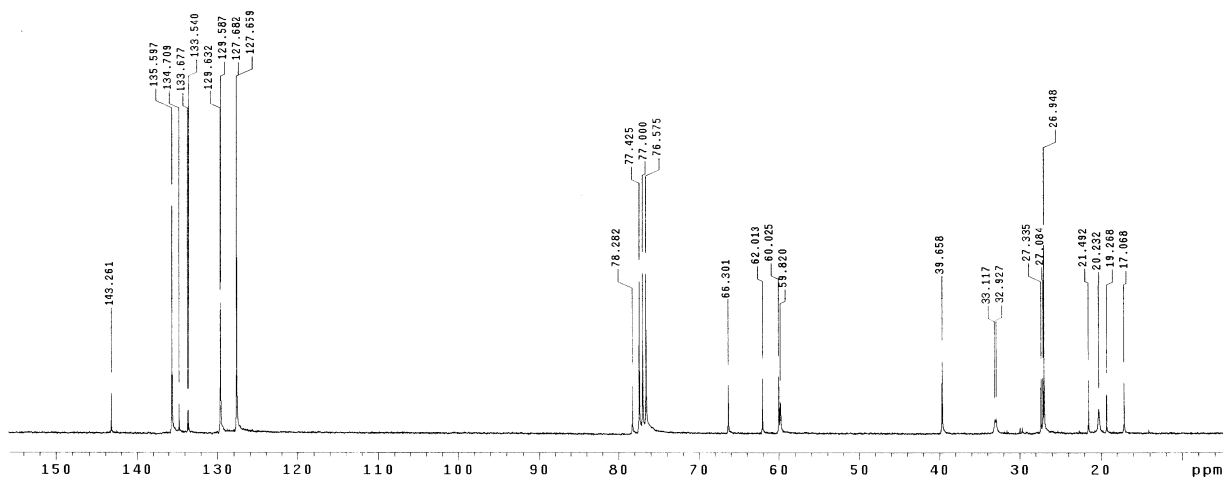

mcp-I-101

Pulse Sequence: s2pul  
 Solvent: CDCl3  
 Ambient temperature  
 INOVA-500 "tocsy.chem.buffalo.edu"

Relax. delay 2.000 sec  
 Pulse 34.6 degrees  
 Acq. time 1.831 sec  
 Width 10000.0 Hz  
 16 repetitions  
 OBSERVE H1, 499.8984024 MHz  
 DATA PROCESSING  
 Line broadening 0.7 Hz  
 FT size 65536  
 Total time 1 min, 18 sec

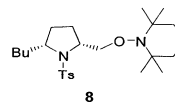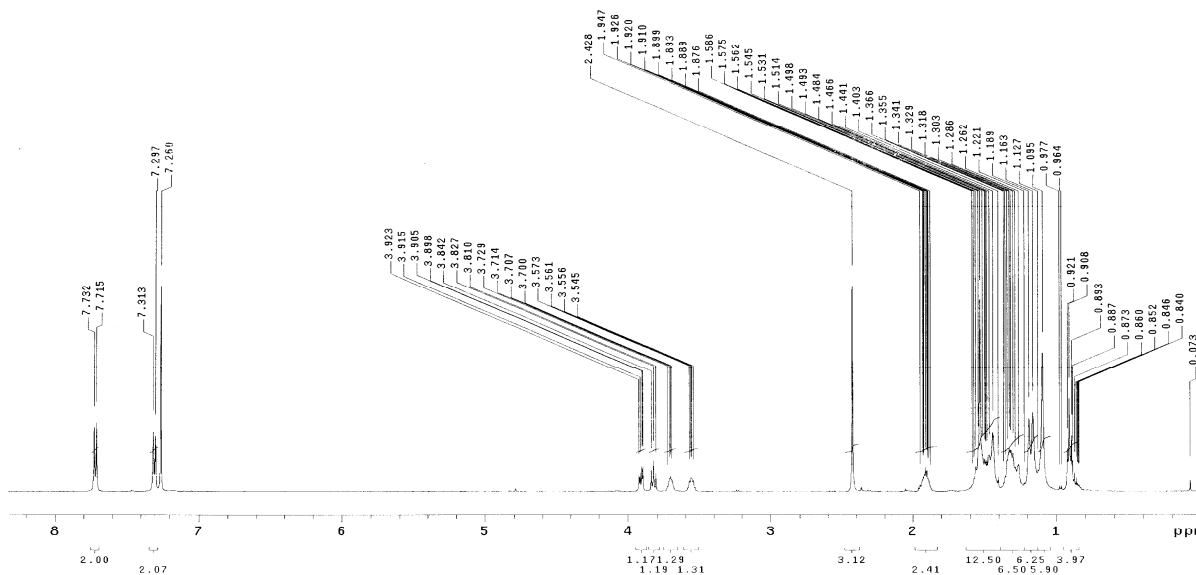

mcp-I-186CNMR  
 Pulse Sequence: s2pu1  
 Solvent: CDCl3  
 Ambient temperature  
 Sample #2, User: 1-14-87  
 File: mcp-I-186CNMR  
 INOVA-500 "nmrdata.chem.buffalo.edu"  
 Relax. delay 6.000 sec  
 Pulse 81.8 degrees  
 Acq. time 1.390 sec  
 Width 37037.0 Hz  
 7000 repetitions  
 OBSERVE C13, 125.695533 MHz  
 DECOUPLE H1, 499.9008903 MHz  
 Power 40 dB  
 continuously on  
 WALTZ-16 modulated  
 DATA PROCESSING  
 Line broadening 0.5 Hz  
 FT size 131072  
 Total time 14 hr, 13 min, 13 sec

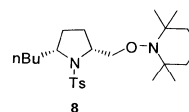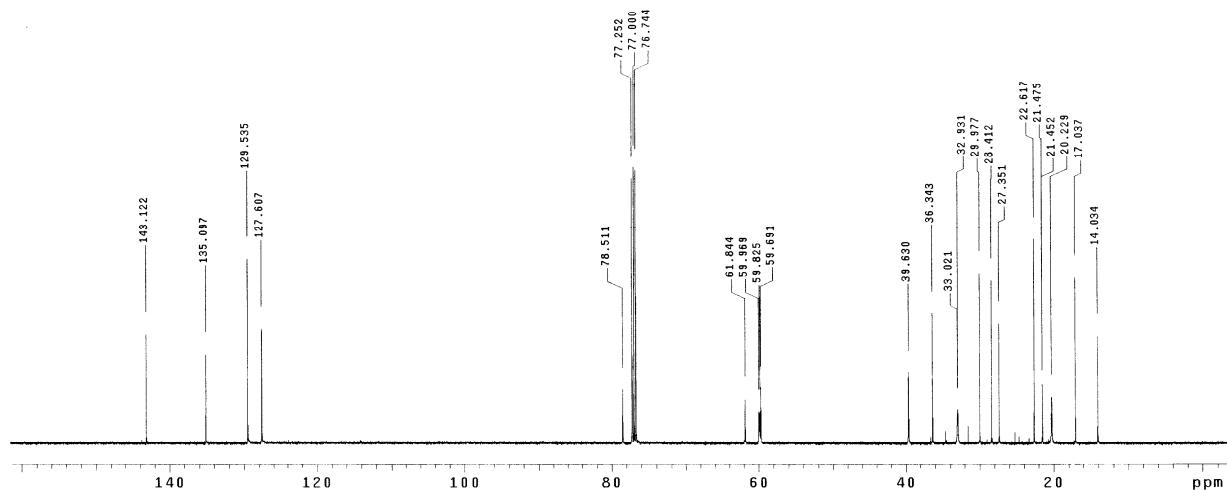

mcp-I-114NOESY  
 Pulse Sequence: NOESY1D  
 Solvent: Benzene  
 Ambient temperature  
 Sample #2  
 File: mcp-I-114NOESY  
 INOVA-500 "nmrdata.chem.buffalo.edu"  
 Relax. delay 1.000 sec  
 Pulse 30.0 degrees  
 Mixing 0.500 sec  
 Acq. time 1.890 sec  
 Width 1338.2 Hz  
 11800 repetitions  
 OBSERVE H1, 499.8984254 MHz  
 DATA PROCESSING  
 Line broadening 0.5 Hz  
 FT size 8192  
 Total time 11 hr, 36 min, 50 sec

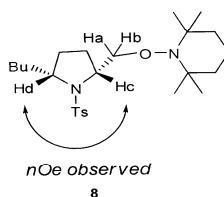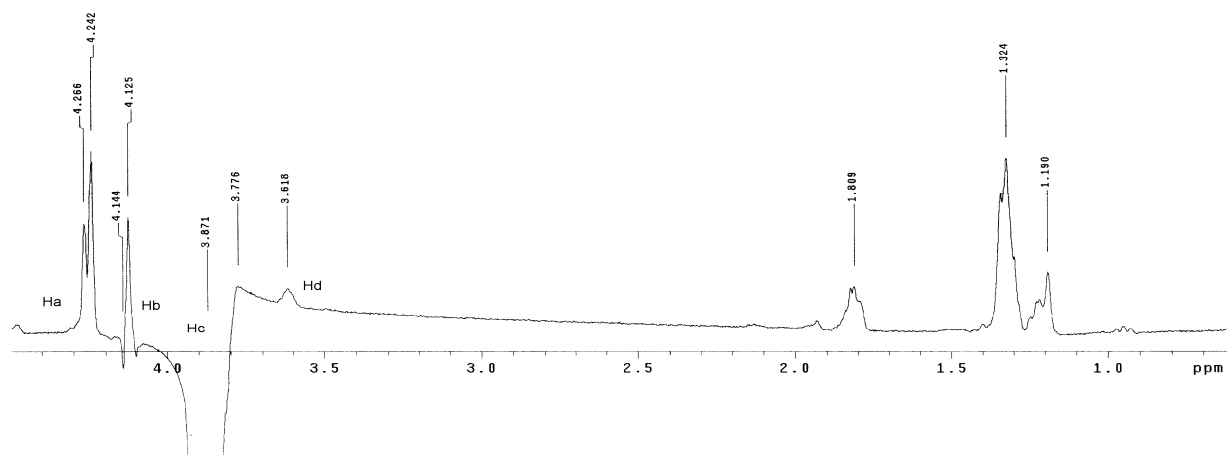

mcp-I-181-1-afterhplc  
 Pulse Sequence: s2pu1  
 Solvent: CDC13  
 Ambient temperature  
 INOVA-500 "tocsy.chem.buffalo.edu"  
 Relax. delay 2.000 sec  
 Pulse 34.6 degrees  
 Acq. time 1.881 sec  
 Width 10000.0 Hz  
 16 repetitions  
 OBSERVE H1, 499.8984027 MHz  
 DATA PROCESSING  
 Line broadening 0. / Hz  
 FT size 65536  
 Total time 1 min, 18 sec

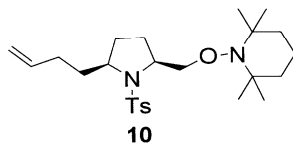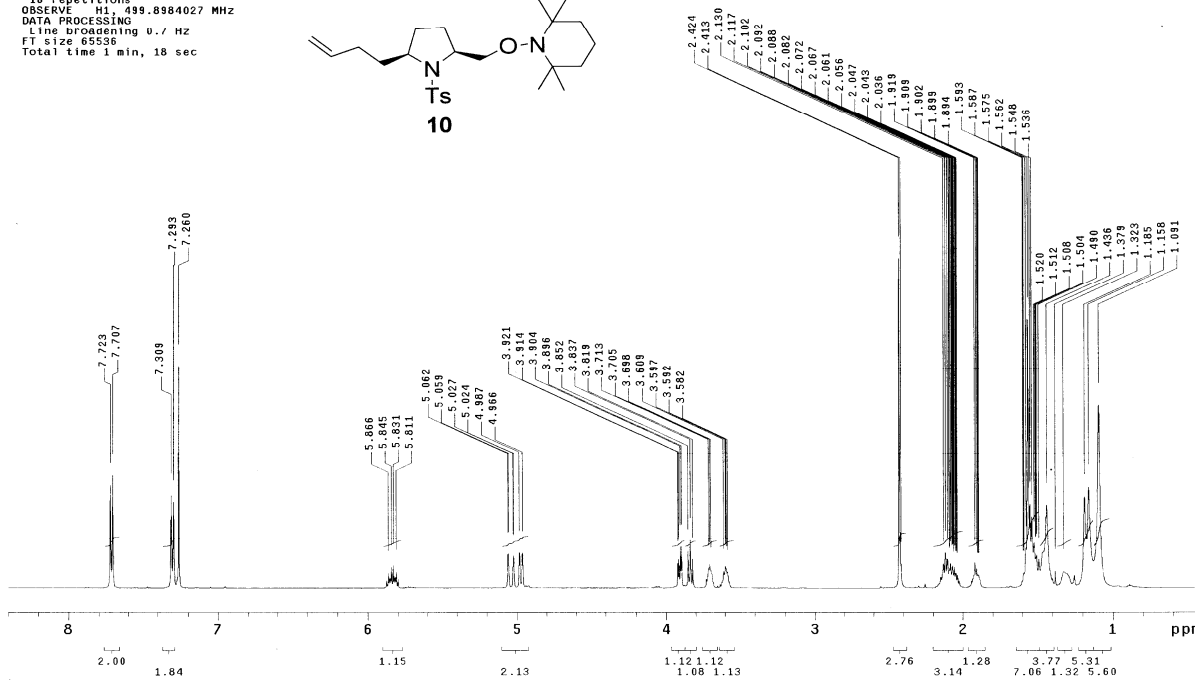

mcp-I-181CNMR  
 Pulse Sequence: s2pu1  
 Solvent: CDC13  
 Ambient temperature  
 Sample #2  
 File: mcp-I-181CNMR  
 INOVA-500 "nmrdata.chem.buffalo.edu"  
 Relax. delay 5.000 sec  
 Pulse 90.0 degrees  
 Acq. time 1.705 sec  
 Width 18761.7 Hz  
 240 repetitions  
 OBSERVE C13, 75.4637897 MHz  
 DECOUPLE H1, 300.0754431 MHz  
 Power 1023 dB  
 continuous by on  
 WALTZ-16 modulated  
 DATA PROCESSING  
 Line broadening 1.0 Hz  
 FT size 65536  
 Total time 56 min, 24 sec

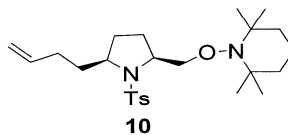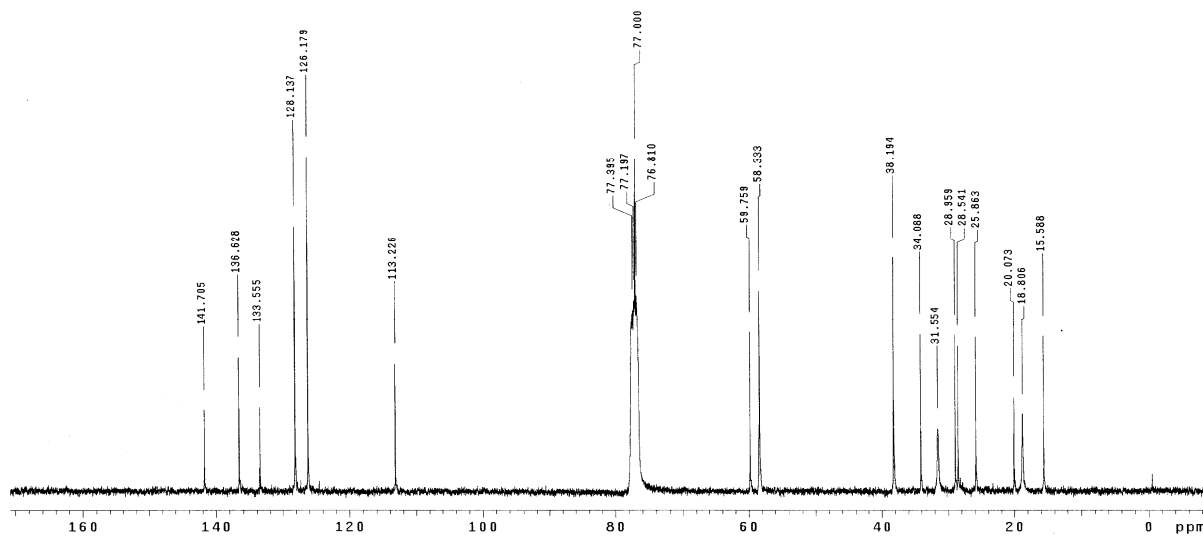

mcp-I-194  
 Pulse Sequence: s2pu1  
 Solvent: CDCl3  
 Ambient temperature  
 INOVA-500 "tocsy.chem.buffalo.edu"  
 Relax. delay 2.000 sec  
 Pulse 34.6 degrees  
 Acq. time 1.881 sec  
 Width 10000.0 Hz  
 16 repetitions  
 OBSERVE H1 499.8984027 MHz  
 DATA PROCESSING  
 Line broadening 0.7 Hz  
 FT size 65536  
 Total time 1 min, 18 sec

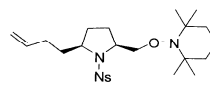

12

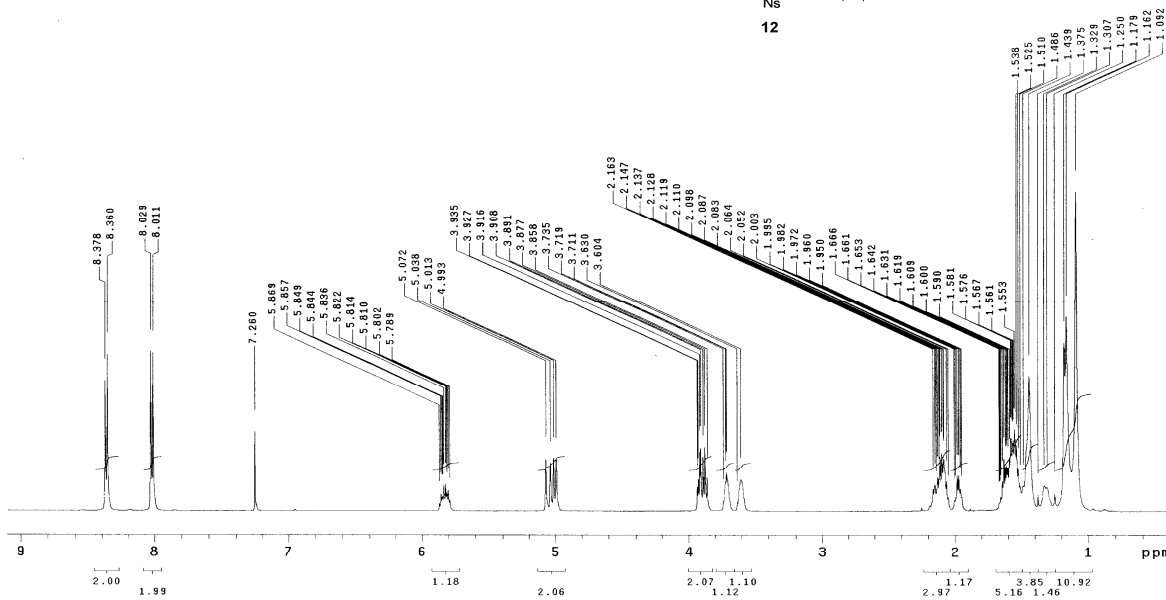

mcp-I-194  
 Pulse Sequence: s2pu1  
 Solvent: CDCl3  
 Ambient temperature  
 Sample #2  
 File: mcp-I-194  
 INOVA-500 "mrdata.chem.buffalo.edu"

Relax. delay 5.000 sec  
 Pulse 30.0 degrees  
 Acq. time 1.708 sec  
 Width 18761.7 Hz  
 812 repetitions  
 OBSERVE C13, 75.4536593 MHz  
 DECOUPLE H1, 300.0754431 MHz  
 Power 1023 dB  
 continuously on  
 WALTZ-16 modulated  
 DATA PROCESSING  
 Line broadening 1.0 Hz  
 FT size 65536  
 Total time 13 hr, 3 min, 48 sec

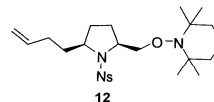

12

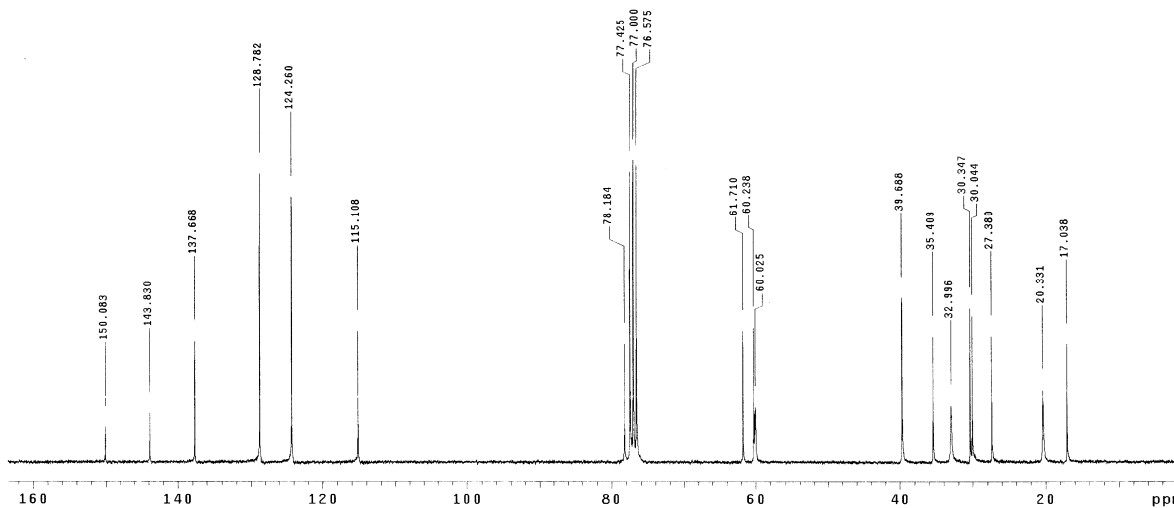

mcp-1-199NOESY2  
 Pulse Sequence: NOESY1D  
 Solvent: Benzene  
 Ambient temperature  
 Sample #2  
 File: mcp-1-199NOESY2  
 INOVA-500 "nar\data.chem.buffalo.edu"  
 Relax. delay 1.000 sec  
 Pulse 50.0 degrees  
 Mixing 0.500 sec  
 Acq. time 1.890 sec  
 Width 2078.6 Hz  
 12000 repetitions  
 OBSERVE H1: 499.8984266 MHz  
 DATA PROCESSING  
 Line broadening 0.5 Hz  
 FT size 8192  
 Total time 12 hr, 7 min, 37 sec

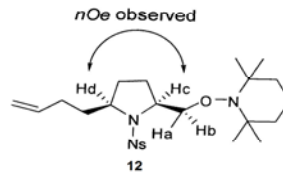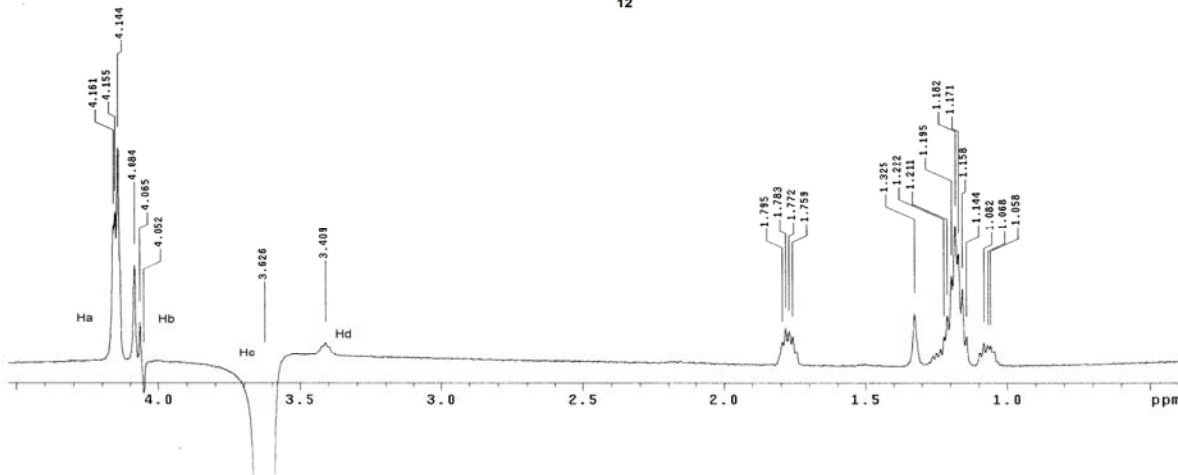

mcp-1-141NOESY2  
 Pulse Sequence: s2pul  
 Solvent: Benzene  
 Ambient temperature  
 INOVA-500 "tossy.chem.buffalo.edu"  
 Relax. delay 2.000 sec  
 Pulse 34.6 degrees  
 Acq. time 1.881 sec  
 Width 10000.0 Hz  
 16 repetitions  
 OBSERVE H1: 499.8984266 MHz  
 DATA PROCESSING  
 Line broadening 0.7 Hz  
 FT size 6536  
 Total time 1 min, 18 sec

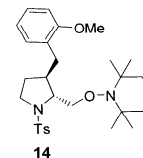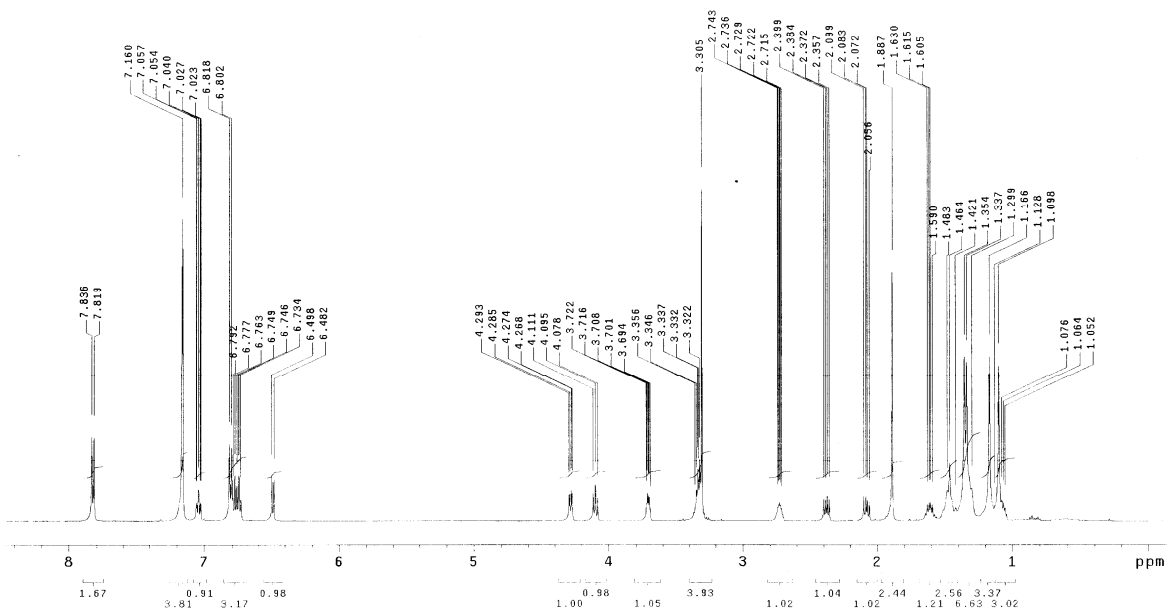



## STANDARD CARBON PARAMETERS

Pulse Sequence: s2pul  
 Solvent: CDCl3  
 Ambient Temperature  
 Sample #: 1-14-87  
 File: mcp-1-136CNMR  
 INOVA-500 "nmrdata.chem.buffalo.edu"  
 Relax. delay 6.000 sec  
 Pulse 81.8 degrees  
 Acq. time 1.300 sec  
 Width 37037.0 Hz  
 728 repetitions  
 OBSERVE C13, 125.6985567 MHz  
 DECOUPLE H1, 499.9006903 MHz  
 Power 49 dB  
 Continuously on  
 WALTZ-16 modulated  
 DATA PROCESSING  
 Line broadening 0.5 Hz  
 FT size 131072  
 Total time 1 hr, 37 min, 56 sec

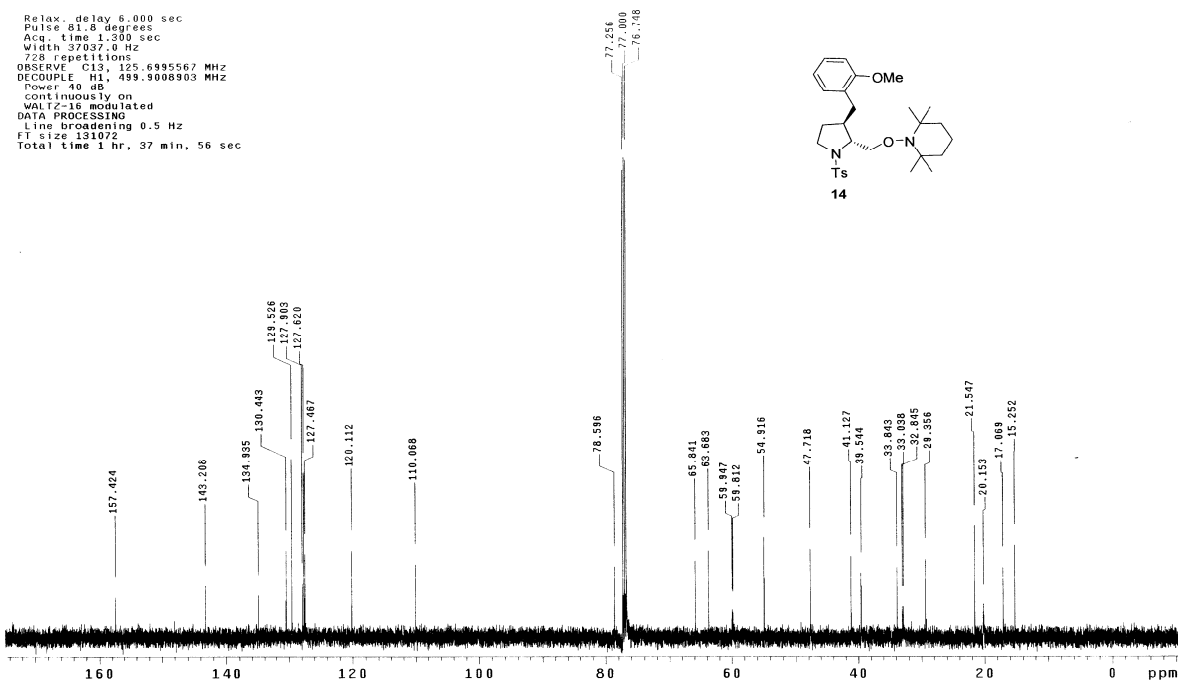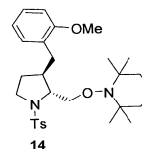

## STANDARD PROTON PARAMETERS

Pulse Sequence: NOESY1D  
 Solvent: Benzene  
 Ambient Temperature  
 INOVA-500 "tocsy.chem.buffalo.edu"  
 Relax. delay 1.000 sec  
 Pulse 90.0 degrees  
 Mixing 0.500 sec  
 Acq. time 1.093 sec  
 Width 2011.1 Hz  
 12000 repetitions  
 OBSERVE H1, 499.8984342 MHz  
 DATA PROCESSING  
 Line broadening 0.5 Hz  
 FT size 8192  
 Total time 12 hr, 7 min, 15 sec

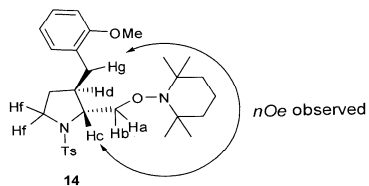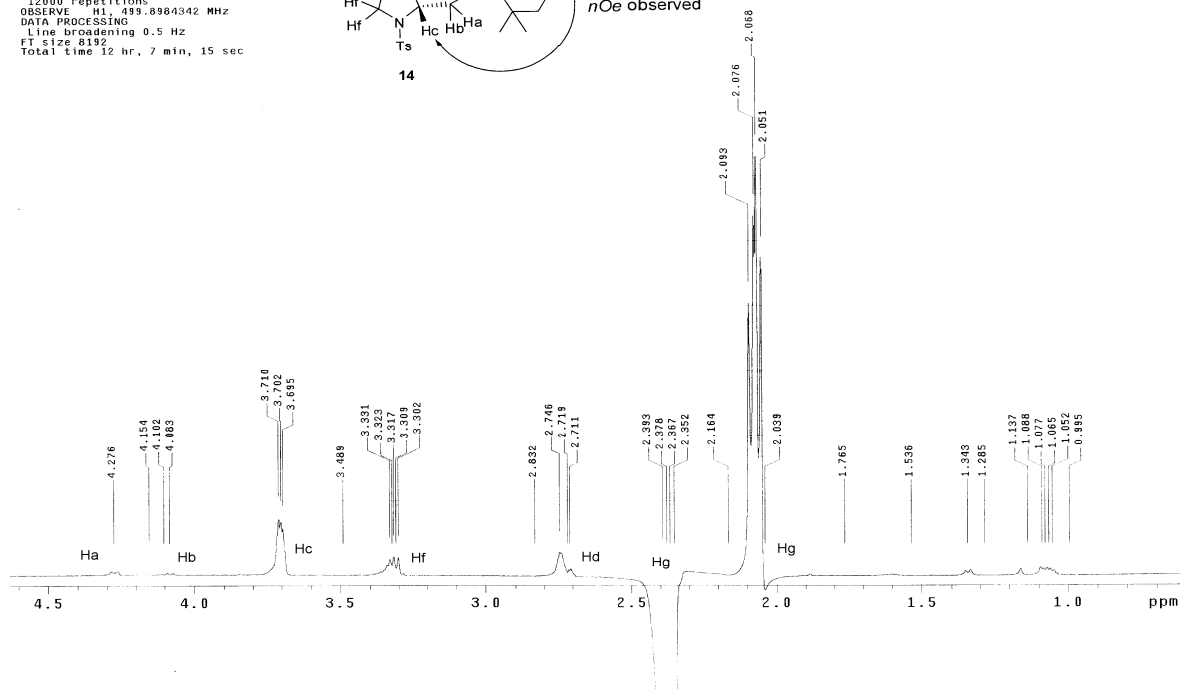

mp-1-131-2  
 Pulse Sequence: s2pul  
 Solvent: CDCl3  
 Ambient Temperature  
 INOVA-500 "tocsy.chem.buffalo.edu"

Relax. delay 2.000 sec  
 Pulse 34.8 degrees  
 Acq. time 1.831 sec  
 Width 10000.0 Hz  
 16 repetitions  
 OBSERVE H1, 499.8984021 MHz  
 DATA PROCESSING  
 Line broadening 0.7 Hz  
 FT size 65536  
 Total time 1 min, 18 sec

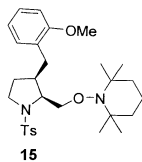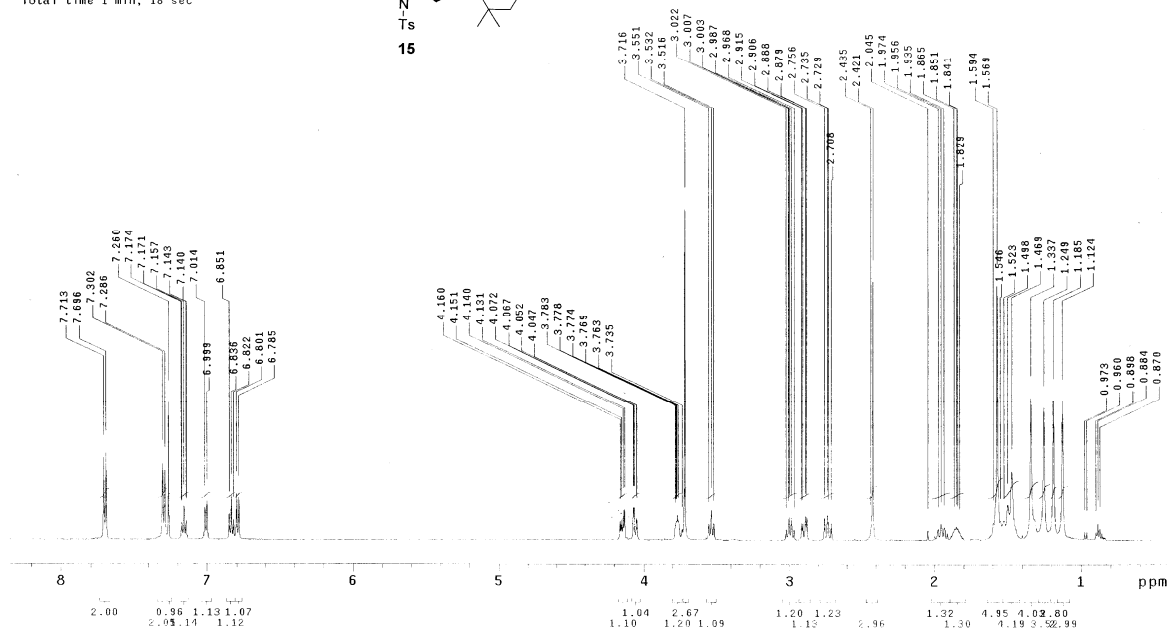

13C OBSERVE

Pulse Sequence: s2pul  
 Solvent: CDCl3  
 Ambient Temperature  
 Sample #2  
 File: mp-1-138-2  
 INOVA-500 "nmrdata.chem.buffalo.edu"

Relax. delay 5.000 sec  
 Pulse 90.0 degrees  
 Acq. time 1.706 sec  
 Width 18781.7 Hz  
 4272 repetitions  
 OBSERVE C13, 75.4536587 MHz  
 DECOUPLE H1, 300.0754431 MHz  
 POWER 1023 dB  
 Continuously on  
 WALTZ-16 modulated  
 DATA PROCESSING  
 Line broadening 1.0 Hz  
 FT size 65536  
 Total time 10 hr, 15 min, 56 sec

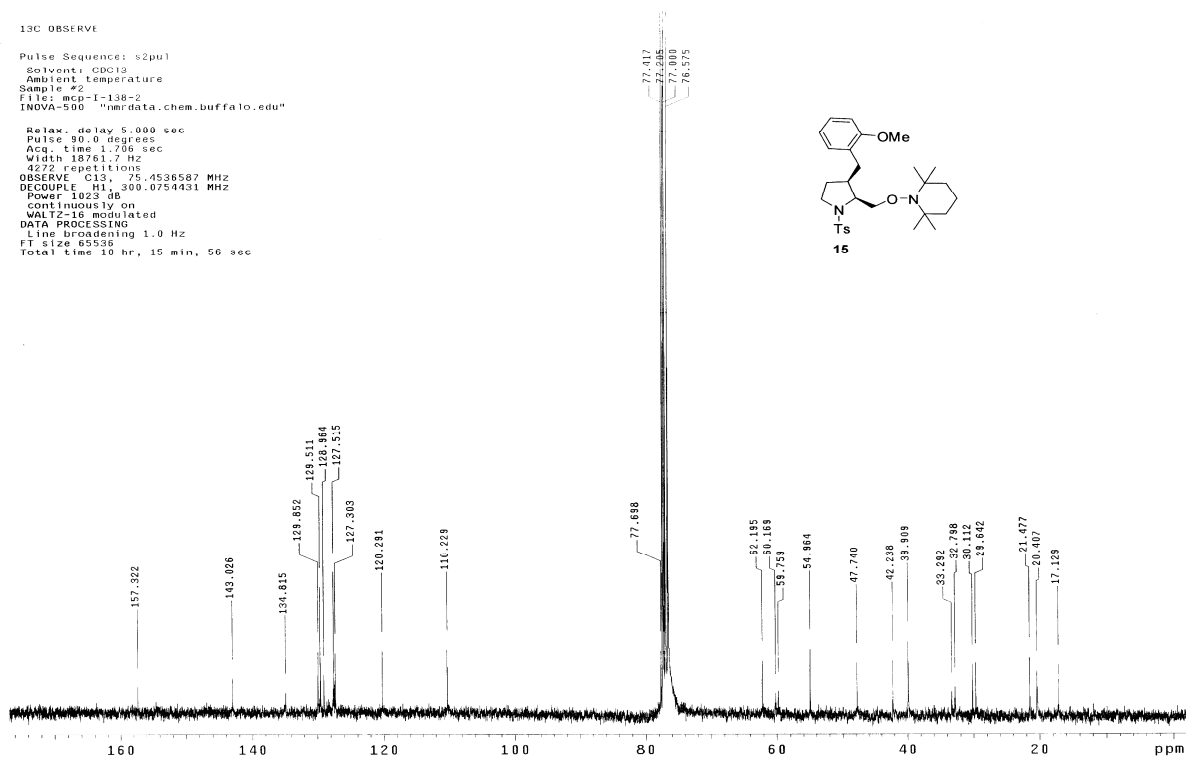

mcp-I-294-2  
Pulse Sequence: s2pul  
Solvent: CDCl3  
Ambient temperature  
INOVA-500 "tccsy.chem.buffalo.edu"  
Relax. delay 2.000 sec  
Pulse 34.6 degrees  
Acq. time 1.881 sec  
Width 10000.0 Hz  
16 repetitions  
USBSKVt H1: 499.8984050 MHz  
DATA PROCESSING  
Line broadening 0.7 Hz  
FT size 65536  
Total time 1 min, 18 sec

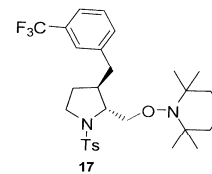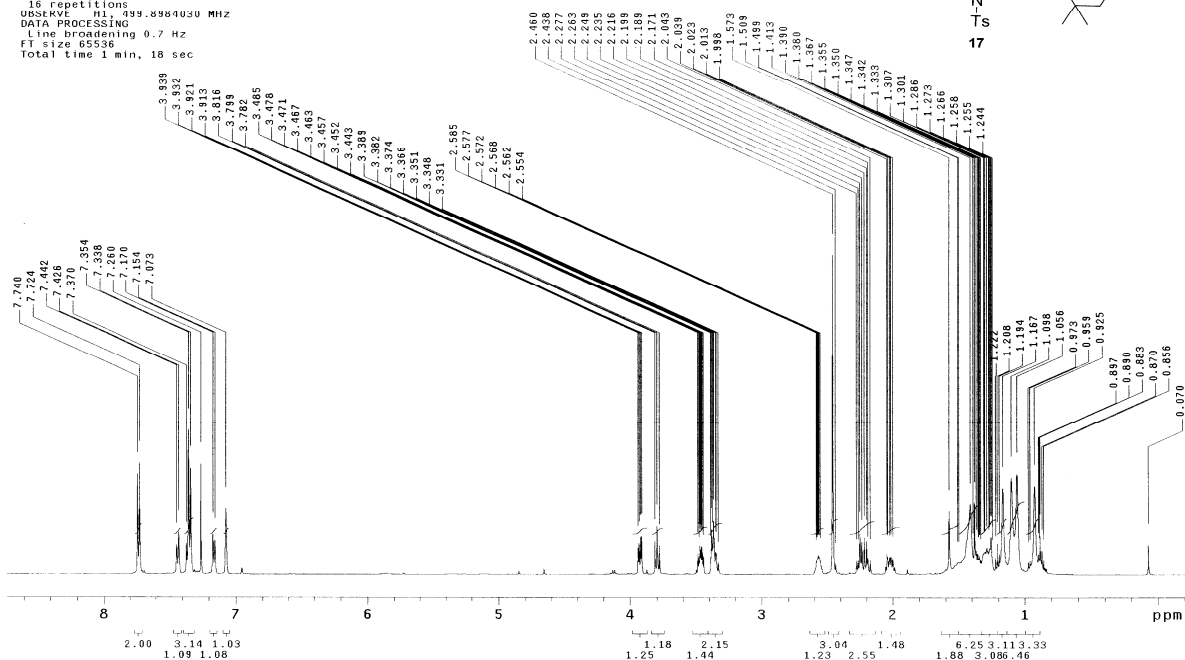

13C OBSERVE

Pulse Sequence: s2pul  
Solvent: CDCl3  
Ambient temperature  
Sample #2  
File: mcp-I-294-2CNMR  
INOVA-500 "nmrdata.chem.buffalo.edu"  
Relax. delay 5.000 sec  
Pulse 90.0 degrees  
Acq. time 1.706 sec  
Width 18761.7 Hz  
4864 repetitions  
OBSERVE C13: 75.4536593 MHz  
DECOUPLE H1: 300.0754431 MHz  
Power 1023 dB  
continuously on  
WALTZ-16 modulated  
DATA PROCESSING  
Line broadening 1.0 Hz  
FT size 65536  
Total time 15 hr, 3 min, 48 sec

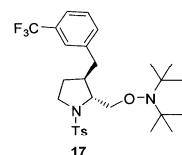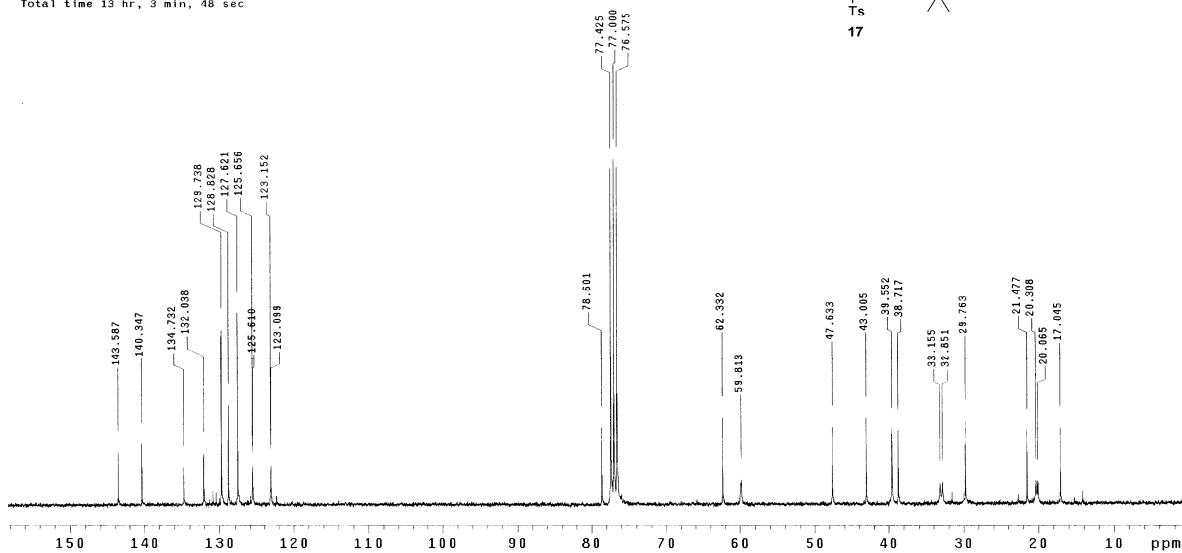

mcp-I-294-1  
 Pulse Sequence: s2pul  
 Solvent: CDCl3  
 Ambient Temperature  
 INOVA-500 "tocsy.chem.buffalo.edu"  
 Relax. delay 2.000 sec  
 Pulse 34.6 degrees  
 Acq. time 1.891 sec  
 Width 10000.0 Hz  
 IS repetitions  
 OBSERVE H1, 499.8984027 MHz  
 DATA PROCESSING  
 Line broadening 0.7 Hz  
 FT size 65536  
 Total time 1 min, 18 sec

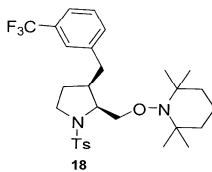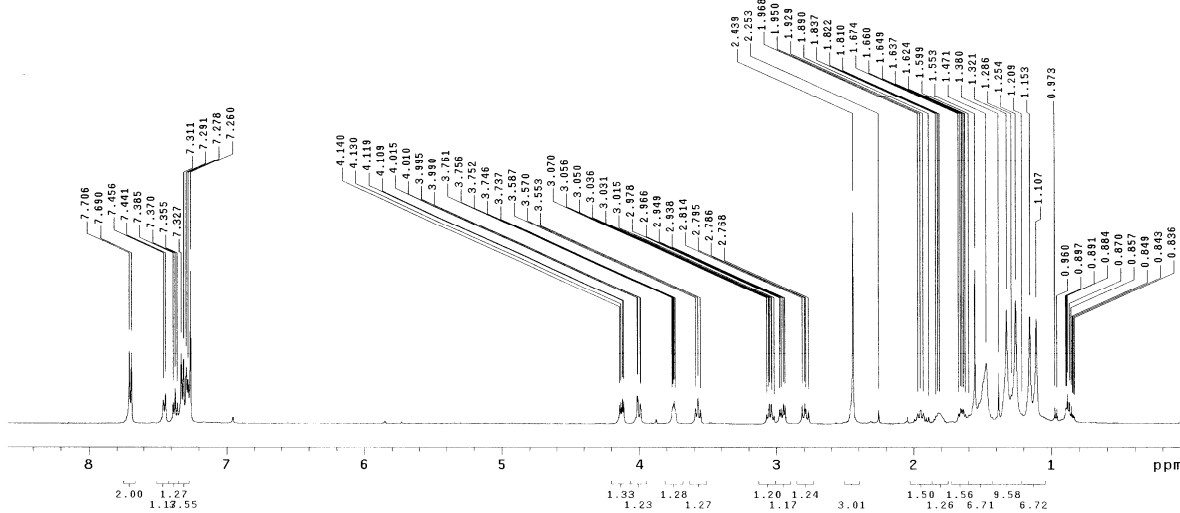

mcp-I-295-1CNMR  
 Pulse Sequence: s2pul  
 Solvent: CDCl3  
 Ambient Temperature  
 Sample #2  
 File: mcp-I-295-1CNMR  
 INOVA-500 "nmr.data.chem.buffalo.edu"  
 Relax. delay 5.000 sec  
 Pulse 90.0 degrees  
 Acq. time 1.700 sec  
 Width 18761.7 Hz  
 5378 repetitions  
 OBSERVE C13, 75.4536593 MHz  
 DECOUPLE H1, 300.0754431 MHz  
 Power 1023 dB  
 continuously on  
 WALTZ-16 modulated  
 DATA PROCESSING  
 Line broadening 1.0 Hz  
 FT size 65536  
 Total time 14 hr, 55 min, 42 sec

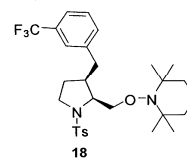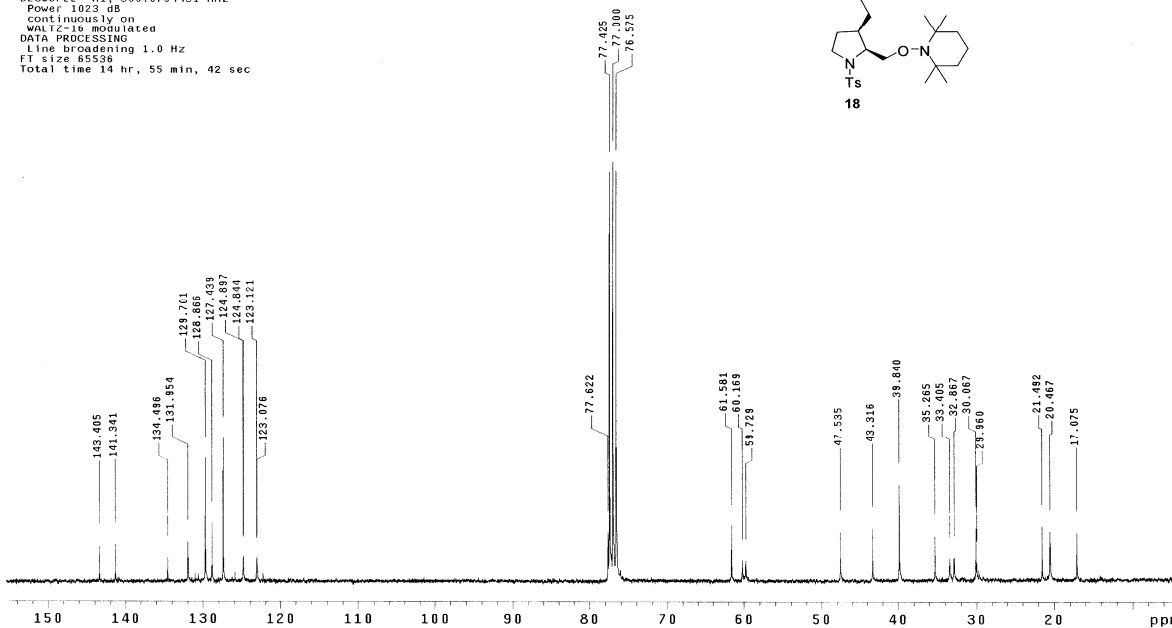





## STANDARD CARBON PARAMETERS

Pulse Sequence: s2pu1  
 Solvent: CDCl3  
 Ambient temperature  
 Sample #2, user: 1-14-87  
 File: mcp-1-aldehydeCNMR  
 INOVA-500 "nmrdata.chem.buffalo.edu"  
 Relax. delay 6.000 sec  
 Pulse 81.0 degrees  
 Acq. time 1.300 sec  
 Width 37037.0 Hz  
 5500 repetitions  
 OBSERVE C13, 125.6995510 MHz  
 DECOUPLE H1, 499.9008903 MHz  
 Power 40 dB  
 Continuously on  
 WALTZ-16 modulated  
 DATA PROCESSING  
 Line broadening 0.5 Hz  
 FT size 131072  
 Total time 11 hr, 10 min, 30 sec

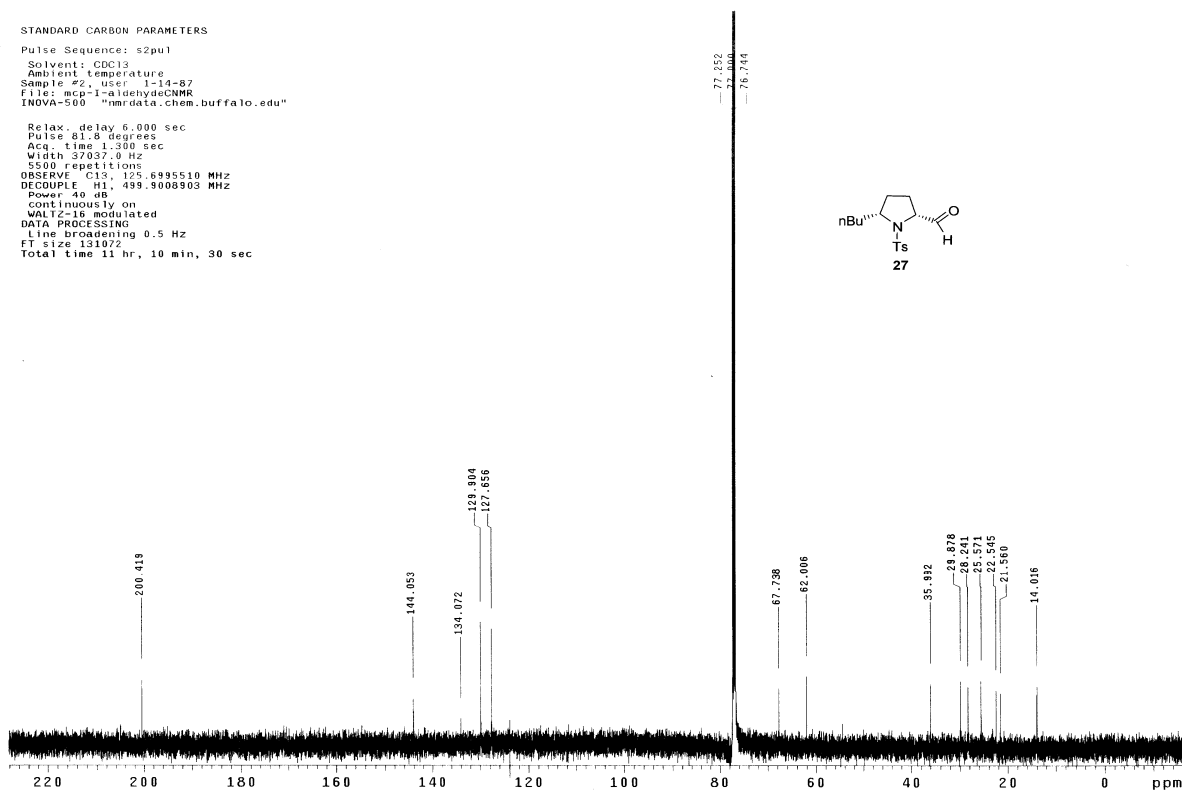

mcp-1-206

Pulse Sequence: s2pu1  
 Solvent: CDCl3  
 Ambient temperature  
 INOVA-500 "tocsy.chem.buffalo.edu"  
 Relax. delay 2.000 sec  
 Pulse 34.6 degrees  
 Acq. time 1.891 sec  
 Width 10000.0 Hz  
 16 repetitions  
 OBSERVE H1, 499.8984030 MHz  
 DATA PROCESSING  
 Line broadening 0.7 Hz  
 FT size 65536  
 Total time 1 min, 18 sec

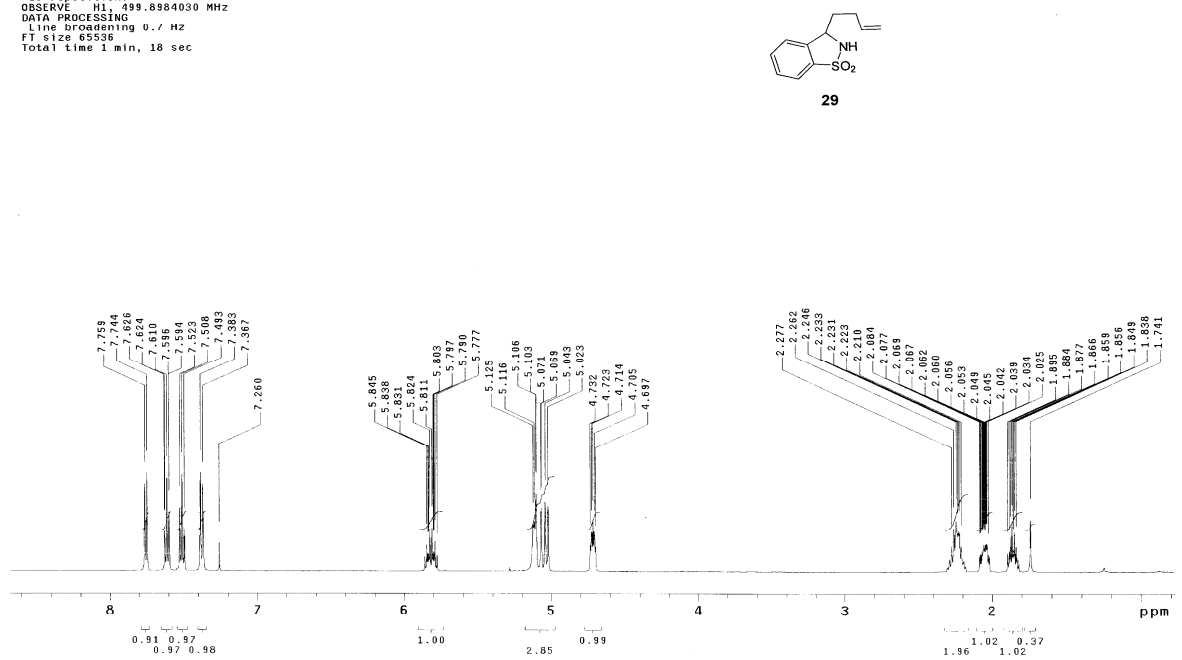

mcp-I-206  
 Pulse Sequence: s2pul  
 Solvent: CDCl3  
 Ambient temperature  
 Sample #2  
 File: mcp-I-206  
 INOVA-500 "nmrdata.chem.buffalo.edu"  
 Relax. delay 5.000 sec  
 Pulse 90.0 degrees  
 Acq. time 1.700 sec  
 Width 18761.7 Hz  
 800 repetitions  
 OBSERVE C13, 75.4536633 MHz  
 DECOUPLE H1, 300.0754431 MHz  
 Power 1023 db  
 continuously on  
 WALTZ-16 modulated  
 DATA PROCESSING  
 Line broadening 1.0 Hz  
 FT size 85536  
 Total time 3 hr, 21 min, 52 sec

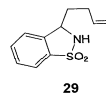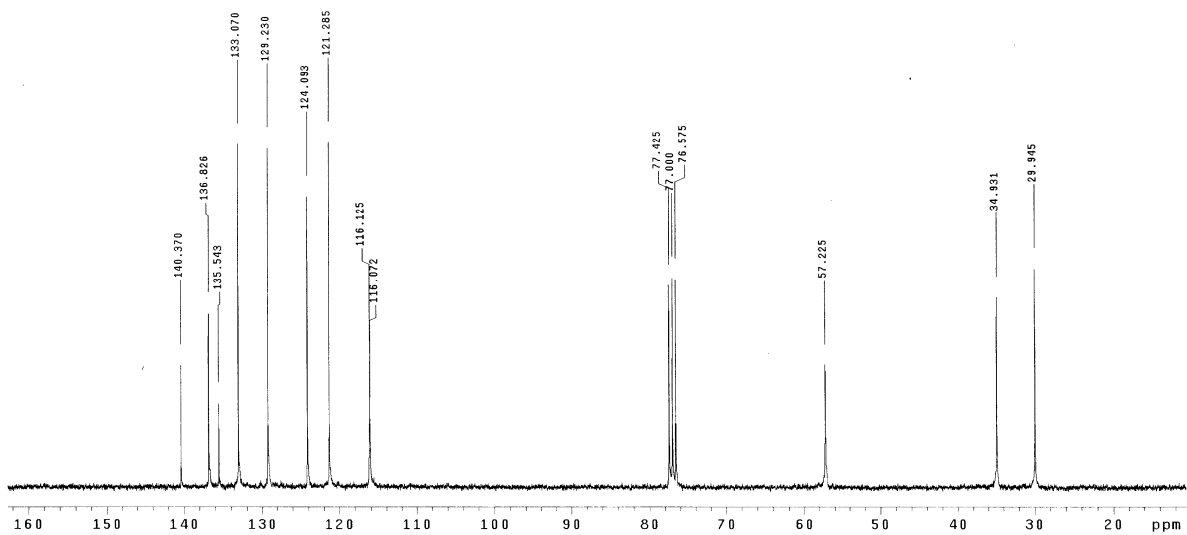

mcp-I-245  
 Pulse Sequence: s2pul  
 Solvent: CDCl3  
 Ambient temperature  
 File: mcp-I-245  
 INOVA-400 "cosy.chem.buffalo.edu"  
 Relax. delay 1.000 sec  
 Pulse 71.4 degrees  
 Acq. time 1.800 sec  
 Width 6000.6 Hz  
 16 repetitions  
 OBSERVE H1, 399.9399022 MHz  
 DATA PROCESSING  
 Line broadening 0.9 Hz  
 FT size 32768  
 Total time 0 min, 44 sec

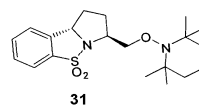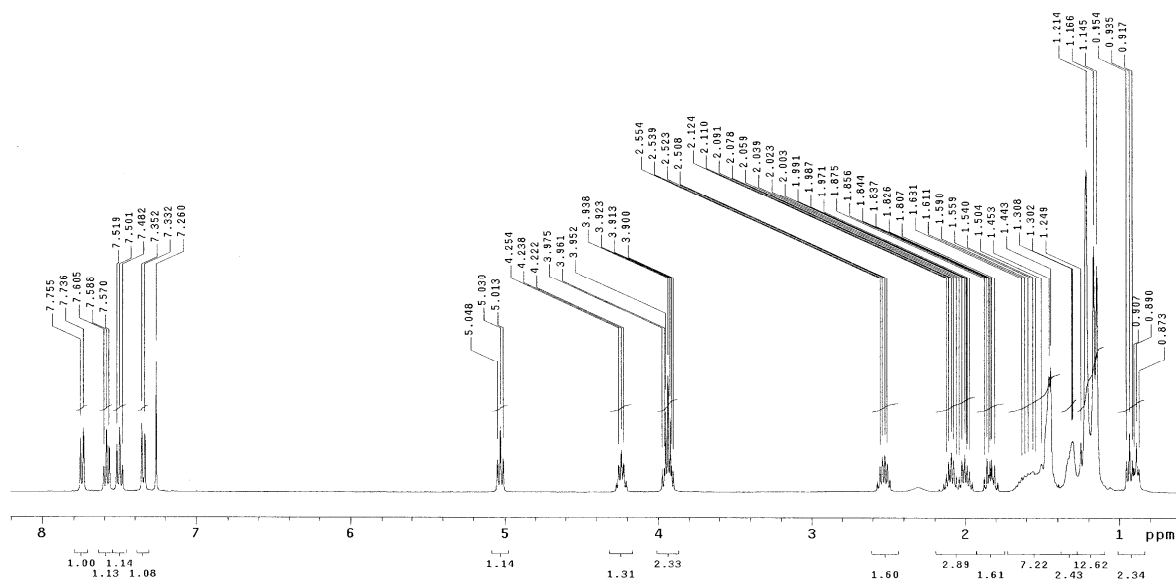



## STANDARD CARBON PARAMETERS

Pulse Sequence: s2pul  
 Solvent: CDCl3  
 Ambient Temperature  
 User: 1-14-87  
 INOVA-500 "tocsy.chem.buffalo.edu"

Relax. delay 6.000 sec  
 Pulse 81.8 degrees  
 Acq. time 1.300 sec  
 Width 37037.0 Hz  
 5568 repetitions  
 OBSERVE C13, 125.6995503 MHz  
 DECOUPLE H1, 499.9068903 MHz  
 Power 40 dB  
 continuously on  
 WALTZ-16 modulated  
 DATA PROCESSING  
 Line broadening 0.5 Hz  
 FT size 131072  
 Total time 12 hr, 11 min, 24 sec

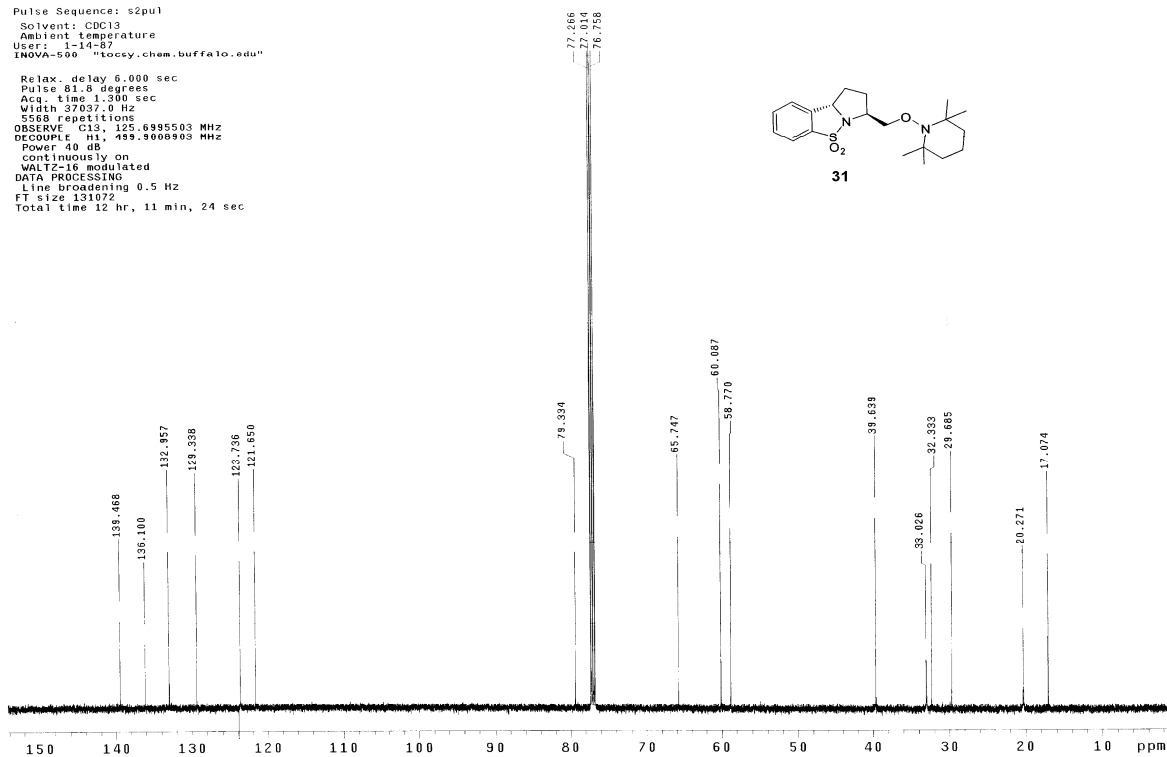

## mcp-I-241afterhplc

Pulse Sequence: s2pul  
 Solvent: CDCl3  
 Ambient Temperature  
 File: mcp-I-241afterhplc  
 INOVA-500 "tocsy.chem.buffalo.edu"

Relax. delay 2.000 sec  
 Pulse 34.6 degrees  
 Acq. time 1.694 sec  
 Width 10000.0 Hz  
 16 repetitions  
 OBSERVE H1, 499.8984030 MHz  
 DATA PROCESSING  
 Line broadening 0.7 Hz  
 FT size 65536  
 Total time 1 min, 18 sec

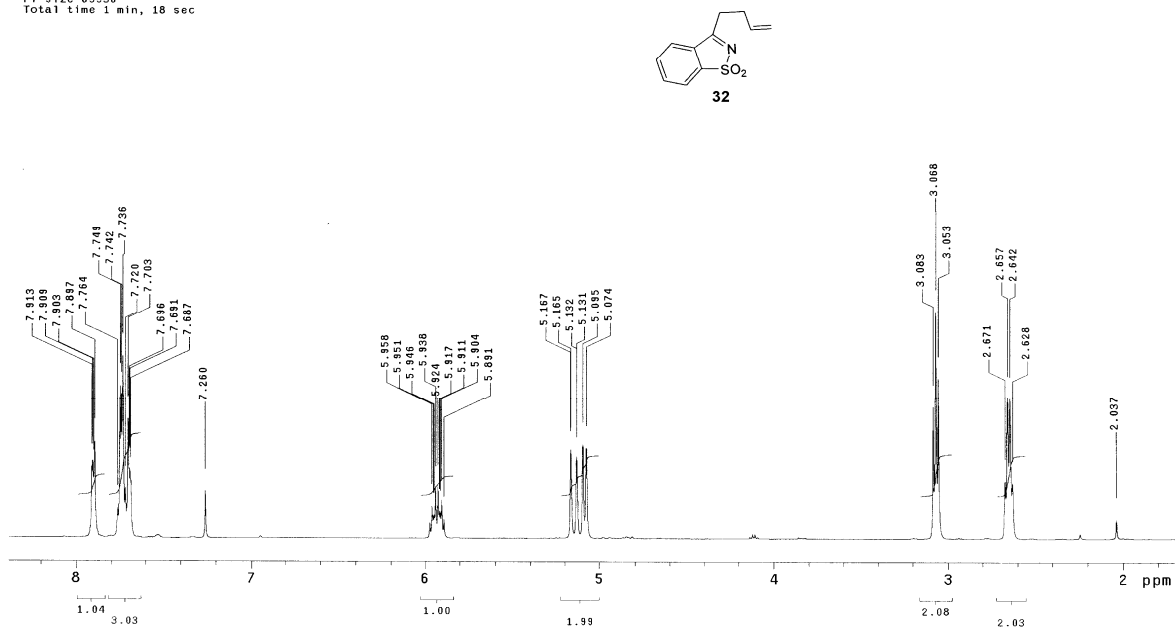

mcp-1-241afterhplc  
Pulse Sequence: s2pul  
Solvent: CDCl3  
Ambient temperature  
Sample #2  
File: mcp-1-241afterhplc  
INOVA-500 "nmrdata.chem.buffalo.edu"

Relax. delay 5.000 sec  
Pulse 90.0 degrees  
Acq. time 1.706 sec  
Width 18761.7 Hz  
5296 repetitions  
OBSERVE C13, 75.4536610 MHz  
DECOUPLE H1, 300.0754431 MHz  
Power 1023 uB  
Continuously on  
WALTZ-16 modulated  
DATA PROCESSING  
Line broadening 1.0 Hz  
FT size 65536  
Total time 14 hr, 55 min, 42 sec

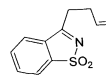

32

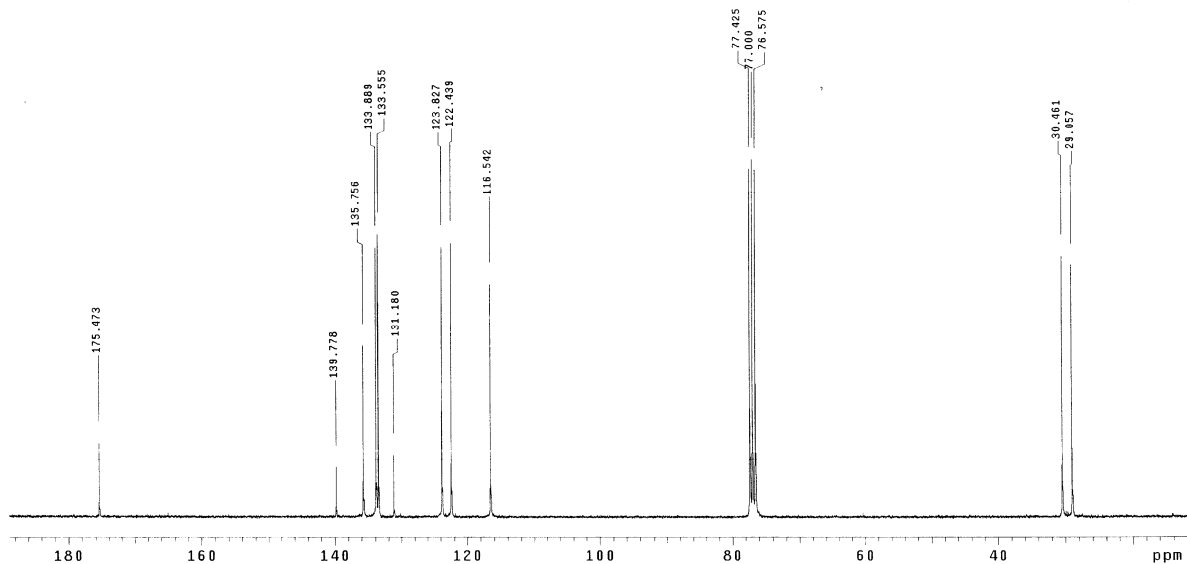

Supplement: NIHMS108652-supplement-6_si_006.pdf [file NIHMS108652-supplement-6_si_006.pdf]
